# Supplementary material
Source: ML conference proceedings conference paper supplement (https://openreview.net/forum?id=ZVuzllOOHS)
Supplement: supplementary_material [file attachment]

---

# Differentially Private Covariance Revisited

---

Wei Dong, Yuting Liang, Ke Yi  
{wdongac,yliangbs,yike}@cse.ust.hk  
Department of Computer Science  
Hong Kong University of Science and Technology

## Abstract

In this paper, we present two new algorithms for covariance estimation under concentrated differential privacy (zCDP). The first algorithm achieves a Frobenius error of  $\tilde{O}(d^{1/4}\sqrt{\text{tr}}/\sqrt{n} + \sqrt{d}/n)$ , where  $\text{tr}$  is the trace of the covariance matrix. By taking  $\text{tr} = 1$ , this also implies a worst-case error bound of  $\tilde{O}(d^{1/4}/\sqrt{n})$ , which improves the standard Gaussian mechanism's  $\tilde{O}(d/n)$  for the regime  $d > \tilde{\Omega}(n^{2/3})$ . Our second algorithm offers a tail-sensitive bound that could be much better on skewed data. The corresponding algorithms are also simple and efficient. Experimental results show that they offer significant improvements over prior work.

## 1 Introduction

Consider a dataset represented by a matrix  $\mathbf{X} \in \mathbb{R}^{d \times n}$ , where each column  $X_i, i = 1, \dots, n$  corresponds to an individual's information. As standard in the literature, we assume that all the  $X_i$ 's live in  $\mathcal{B}_d$ , the  $d$ -dimensional  $\ell_2$ -unit ball centered at the origin. In this paper, we revisit the problem of estimating the (empirical) covariance matrix  $\Sigma(\mathbf{X}) := \frac{1}{n} \sum_i X_i X_i^T = \frac{1}{n} \mathbf{X} \mathbf{X}^T$  under differential privacy (DP), a fundamental problem in high-dimensional data analytics and machine learning that requires little motivation. We often write  $\Sigma(\mathbf{X})$  as  $\Sigma$  when the context is clear. As with most prior work, we use the Frobenius norm  $\|\tilde{\Sigma} - \Sigma\|_F$  to measure the error of the estimated covariance  $\tilde{\Sigma}$ . To better focus, in the introduction we state all results under *concentrated different privacy* (zCDP) [10]; extensions of our results to pure-DP are given in Appendix I.

### 1.1 A Trace-sensitive Algorithm

For any symmetric matrix  $\mathbf{A}$ , we use  $\mathbf{P}[\mathbf{A}]$  and  $\mathbf{\Lambda}[\mathbf{A}]$  to denote its matrices of eigenvectors and eigenvalues, respectively, such that  $\mathbf{A} = \mathbf{P}[\mathbf{A}]\mathbf{\Lambda}[\mathbf{A}]\mathbf{P}[\mathbf{A}]^T$ ; we use  $\lambda_i[\mathbf{A}]$  to denote its  $i$ th largest eigenvalue. When  $\mathbf{A} = \Sigma = \Sigma(\mathbf{X})$ , we simply write  $\mathbf{P} = \mathbf{P}[\Sigma]$ ,  $\mathbf{\Lambda} = \mathbf{\Lambda}[\Sigma]$ ,  $\lambda_i = \lambda_i[\Sigma]$ , so that  $\mathbf{\Lambda} = \text{diag}(\lambda_1, \dots, \lambda_d)$  and  $\Sigma = \mathbf{P}\mathbf{\Lambda}\mathbf{P}^T$ . Let  $\mathbf{P} = [P_1 \ P_2 \ \dots \ P_d]$ , where  $P_i$  is the orthonormal basis vector corresponding to  $\lambda_i$ . Rudimentary linear algebra yields  $\lambda_k = \frac{1}{n} \sum_i (P_k^T X_i)^2$  for  $1 \leq k \leq d$  and  $\|X_i\|_2^2 = \sum_k (P_k^T X_i)^2$  for  $1 \leq i \leq n$ . Thus, it follows that

$$\text{tr}[\Sigma] = \text{tr}[\mathbf{\Lambda}] = \sum_k \lambda_k = \sum_k \frac{1}{n} \sum_i (P_k^T X_i)^2 = \frac{1}{n} \sum_i \sum_k (P_k^T X_i)^2 = \frac{1}{n} \sum_i \|X_i\|_2^2.$$

That is,  $0 \leq \text{tr}[\mathbf{\Lambda}] \leq 1$  is the average  $\ell_2$  norm (squared) of the  $X_i$ 's, and we simply write it as  $\text{tr}$ .

Recall that it is assumed that all the  $X_i$ 's live in  $\mathcal{B}_d$ . In practice, this is enforced by assuming an upper bound  $B$  on the norms and scaling down all  $X_i$  by  $B$ . As one often uses a conservatively large  $B$ , typical values of  $\text{tr}$  can be much smaller than 1, so a trace-sensitive algorithm would be

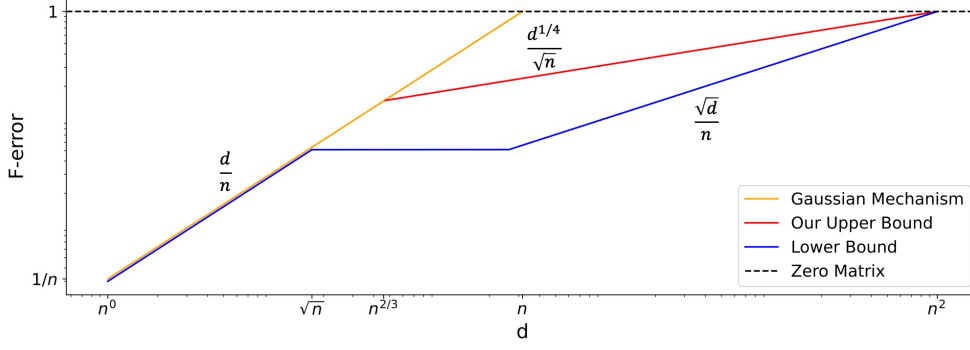

Figure 1: Currently known worst-case error bounds (both axes are in log scale).

more desirable. Indeed, Amin et al. [2] take this approach, describing an algorithm with error<sup>1</sup>  $\tilde{O}(d^{3/4}\sqrt{\text{tr}}/\sqrt{n} + \sqrt{d}/n)$  under zCDP<sup>2</sup>. Note that the  $\sqrt{d}/n$  term inherits from mean estimation and the first term is the “extra” difficulty for covariance estimation. In this paper, we improve this term to  $d^{1/4}\sqrt{\text{tr}}/\sqrt{n}$  (we have a similar, albeit lesser, improvement under pure-DP; see Appendix I). Our algorithm is very simple: We first estimate  $\mathbf{A}$  using the Gaussian mechanism (this is the same as in [2, 22]), then we estimate  $\mathbf{P}$  by doing an eigendecomposition of  $\mathbf{\Sigma}$  masked with Gaussian noise. Intuitively, we obtain a  $\sqrt{d}$ -factor improvement over the iterative methods of [2, 22], because we can obtain all eigenvectors from one noisy  $\mathbf{\Sigma}$ , while the iterative methods must allocate the privacy budget to all  $d$  eigenvectors. Our algorithm is also more efficient, performing just two eigendecompositions and one matrix multiplication, whereas the algorithm in [2, 22] needs  $O(d)$  such operations.

**Implication to worst-case bounds.** Covariance matrix has also been studied in the traditional worst-case setting, i.e., the bound should only depend on  $d$  and  $n$ . Dwork et al. [17] show that the  $\ell_2$ -sensitivity of  $\mathbf{\Sigma}$ , i.e.,  $\max_{\mathbf{X} \sim \mathbf{X}'} \|\mathbf{\Sigma}(\mathbf{X}) - \mathbf{\Sigma}(\mathbf{X}')\|_F$  where  $\mathbf{X} \sim \mathbf{X}'$  denotes two neighboring datasets that differ by one column, is  $O(1/n)$ . Thus, the standard *Gaussian mechanism* achieves an error of  $\tilde{O}(d/n)$  by adding an independent Gaussian noise of scale  $\tilde{O}(1/n)$  to each of the  $d^2$  entries of  $\mathbf{\Sigma}$ . By taking  $\text{tr} = 1$ , our trace-sensitive bound degenerates into  $\tilde{O}(d^{1/4}/\sqrt{n})$ . Note that the  $\sqrt{d}/n$  term is dominated by  $d^{1/4}/\sqrt{n}$  for  $d < \tilde{O}(n^2)$ , which is the parameter regime that allows non-trivial utility (i.e., the error is less than 1).

To better understand the situation, it is instructive to compare covariance estimation with mean estimation (where data are also drawn from the  $\ell_2$  unit ball and the error is measured in  $\ell_2$  norm), as the hardness of covariance estimation lies between  $d$ -dimensional mean estimation (only estimating the diagonal entries of  $\mathbf{\Sigma}$ ) and  $d^2$ -dimensional mean estimation (treating  $\mathbf{\Sigma}$  as a  $d^2$ -dimensional vector). This observation implies a lower bound  $\tilde{\Omega}(\sqrt{d}/n)$  following from the same lower bound for mean estimation [19]<sup>3</sup>, and an upper bound  $\tilde{O}(d/n)$  attained by the Gaussian mechanism. For  $d < O(\sqrt{n})$ , Kasiviswanathan et al. [23] prove a higher lower bound<sup>4</sup>  $\tilde{\Omega}(d/n)$ , which means that the complexity of covariance estimation is same as  $d^2$ -dimensional mean estimation in the low-dimensional regime, so one cannot hope to beat the Gaussian mechanism for small  $d$ . However, in the high-dimensional regime, our result indicates that the covariance problem is strictly easier, due to the correlations of the  $d^2$  entries of  $\mathbf{\Sigma}$ . Another interesting consequence is that our error bound has utility for  $d$  up to  $\tilde{O}(n^2)$  (utility is lost when the error is  $\tilde{O}(1)$ , as returning a zero matrix can already achieve this error). This is the highest  $d$  that allows for any utility, since even mean estimation requires  $d < \tilde{O}(n^2)$  to have utility under zCDP [19, 10]. We pictorially show the currently known

<sup>1</sup>We use the  $\tilde{O}$  notation to suppress the dependency on the privacy parameters and all polylogarithmic factors. We use  $e$  as the base of log (unless stated otherwise) and define  $\log(x) = 1$  for any  $x \leq e$ .

<sup>2</sup>Their paper states the error bound under pure-DP and for estimating  $\mathbf{X}\mathbf{X}^T$  (i.e., without normalization by  $1/n$ ); we show how this bound is derived from their result in Appendix C.

<sup>3</sup>This paper proves the lower bound under the statistical setting; in Appendix D, we show how it implies the claimed lower bound under the empirical setting.

<sup>4</sup>Their lower bound is under approximate-DP, which also holds under zCDP.

(worst-case) upper and lower bounds in Figure 1. It remains an interesting open problem to close the gap for  $\tilde{\Omega}(\sqrt{n}) < d < \tilde{O}(n^2)$ .

Through private communication with Aleksandar Nikolov, it is observed that the *projection mechanism* [31, 15] can also be shown to have error  $\tilde{O}(d^{1/4}/\sqrt{n})$  when applied to the covariance problem. In Appendix E, we make this connection more explicit, while also giving an efficient implementation. However, the projection mechanism is not trace-sensitive.

## 1.2 A Tail-sensitive Algorithm

A trace-sensitive bound only makes use of the average  $\ell_2$  norm, which cannot capture the full distribution. Next, we design an algorithm with an error bound that more closely depends on the distribution of the norms. We characterize this distribution using the  $\tau$ -tail ( $\mathbb{I}(\cdot)$  is the indicator function):

$$\gamma(\mathbf{X}, \tau) = \frac{1}{n} \sum_i \|X_i\|_2^2 \cdot \mathbb{I}(\|X_i\|_2 > \tau), \tau \in [0, 1]. \quad (1)$$

Note that  $\gamma(\mathbf{X}, \tau)$  decreases as  $\tau$  increases. In particular,  $\gamma(\mathbf{X}, 0) = \text{tr}$ ,  $\gamma(\mathbf{X}, 1) = 0$ .

A common technique to reduce noise, at the expense of some bias, is to clip all the  $X_i$ 's so that they have norms at most  $\tau$ , for some threshold  $\tau$ . This yields an error of  $\text{Noise}(\mathbf{X}, \tau) + \gamma(\mathbf{X}, \tau)$ , where  $\text{Noise}(\mathbf{X}, \tau)$  denotes the error bound of the mechanism when all the  $X_i$ 's have norm bounded by  $\tau$ , and  $\gamma(\mathbf{X}, \tau)$  is the (additional) bias caused by clipping. Opting for the better of the Gaussian mechanism or our trace-sensitive mechanism, we have

$$\text{Noise}(\mathbf{X}, \tau) = \tilde{O} \left( \min \left( \frac{\tau^2 d}{n}, \frac{\tau d^{1/4} \sqrt{\text{tr}}}{\sqrt{n}} + \frac{\tau^2 \sqrt{d}}{n} \right) \right). \quad (2)$$

The technical challenge is therefore choosing a good  $\tau$  in a differentially private manner. We design a DP mechanism to choose the optimal  $\tau$  up to a polylogarithmic multiplicative factor and an exponentially small additive term. It also adaptively selects the better of Gaussian mechanism or the trace-sensitive mechanism depending on the relationship between  $d, n$ , and a privatized  $\text{tr}$ . More precisely, our adaptive mechanism achieves an error of

$$\tilde{O} \left( \min_{\tau} (\text{Noise}(\mathbf{X}, \tau) + \gamma(\mathbf{X}, \tau)) + 2^{-dn} \right). \quad (3)$$

Note that this tail-sensitive bound is always no worse (modulo the  $2^{-dn}$  term) than  $\text{Noise}(\mathbf{X}, 1)$  (i.e., without clipping), and can be much better for certain norm distributions. In particular, the tail-sensitive bound would work very well on many real datasets with skewed distributions, e.g., most data vectors have small norms with a few having large norms. For example, suppose  $d = n^{3/4}$ , and a constant number of data vectors have  $\ell_2$  norm 1 while the others have norm  $n^{-1/4}$ . Then  $\sqrt{\text{tr}} = \Theta(n^{-1/4})$ , so  $\text{Noise}(\mathbf{X}, 1)$  takes the trace-sensitive bound, which is  $\tilde{O}(n^{-9/16})$ . On the other hand, (3) is at most  $\tilde{O}(n^{-13/16})$  by taking  $\tau = n^{-1/4}$ .

## 2 Related Work

Mean estimation and covariance estimation are perhaps the most fundamental problems in statistics and machine learning, and how to obtain the best estimates while respecting individual's privacy has attracted a lot of attention in recent years. Mean estimation under differential privacy is now relatively well understood, with the optimal worst-case error being  $\tilde{\Theta}(\sqrt{d}/n)$  [19], achieved by the standard Gaussian mechanism [17]. In contrast, the covariance problem is more elusive. As indicated in Figure 1, its complexity is probably a piecewise linear (in the log-log scale) function.

When most data have norms much smaller than the upper bound given *a priori*, the worst-case bounds above are no longer optimal. In these cases, it is more desirable to have an error bound that is instance-specific. Clipping is a common technique for mean estimation [3, 18, 4, 34, 29] and it is known that running the Gaussian mechanism after clipping  $\mathbf{X}$  with a certain quantile of the norms of the  $X_i$ 's achieves instance-optimality in a certain sense [3, 18]. However, for covariance estimation, we show in Appendix F that no quantile can be the optimal clipping threshold achieving the bound in

(3). Nevertheless, the bound in (3) is only achieving the optimal clipping threshold; we cannot say that is instance-optimal, since  $\text{Noise}(\cdot)$  is not even known to be worst-case optimal.

Closely related to covariance estimation are the PCA problem and low-rank approximation. Instead of finding all eigenvalues and eigenvectors, they only aim at finding the largest one or a few. For these problems, iterative methods [2, 22, 38, 17, 11, 36] should perform better than the Gaussian mechanism or our algorithm, both of which try to recover the full covariance matrix.

Many covariance estimation algorithms have been proposed under the statistical setting, where the  $X_i$ 's are i.i.d. samples drawn from a certain distribution, e.g., a multivariate Gaussian [19, 9, 8, 1, 21, 28, 5, 25]. Instead of the Frobenius error, many of them adopt the Mahalanobis error  $\|\tilde{\Sigma} - \Sigma\|_{\Sigma} := \|\Sigma^{-1/2}\tilde{\Sigma}\Sigma^{-1/2} - \mathbf{I}\|_F$ , which can be considered as a normalized version of the former. It is known that  $\lambda_d\|\mathbf{A} - \Sigma\|_{\Sigma} \leq \|\mathbf{A} - \Sigma\|_F \leq \lambda_1\|\mathbf{A} - \Sigma\|_{\Sigma}$ , so when  $\Sigma_{\mathbb{D}}$  is well-conditioned, i.e.,  $\lambda_1/\lambda_d = O(1)$ , any Frobenius error directly translates to a Mahalanobis error. However, for the Mahalanobis error, the more challenging question is how to deal with an ill-conditioned  $\Sigma$ , for which [19, 8] have provided elegant solutions for the case where  $\mathbb{D}$  is a multivariate Gaussian. It would be interesting to see if their methods can be combined with the tail-sensitive techniques in this paper to solve this problem for other distribution families, in particular, heavy-tailed distributions. For the lower bound, very recently, Kamath et al. [20] proved a similar lower bound for the low-dimensional regime as in [23] but under the statistical setting.

### 3 Preliminaries

#### 3.1 Differential Privacy

We say that  $\mathbf{X}, \mathbf{X}' \in \mathbb{R}^{d \times n}$  are neighbors if they differ by one column, denoted  $\mathbf{X} \sim \mathbf{X}'$ .

**Definition 1** (Differential Privacy (DP) [16]). For  $\varepsilon > 0$  and  $\delta \geq 0$ , a randomized mechanism  $\mathcal{M} : \mathbb{R}^{d \times n} \rightarrow \mathcal{Y}$  satisfies  $(\varepsilon, \delta)$ -DP if for any  $\mathbf{X} \sim \mathbf{X}'$  and any  $\mathcal{S} \subseteq \mathcal{Y}$ ,  $\Pr[\mathcal{M}(\mathbf{X}) \in \mathcal{S}] \leq e^{\varepsilon} \cdot \Pr[\mathcal{M}(\mathbf{X}') \in \mathcal{S}] + \delta$ .

In particular, we call it *pure-DP* if  $\delta = 0$ ; otherwise *approximate-DP*.

**Definition 2** (Concentrated Differential Privacy (zCDP) [10]). For  $\rho > 0$ , a randomized mechanism  $M : \mathbb{R}^{d \times n} \rightarrow \mathcal{Y}$  satisfies  $\rho$ -zCDP if for any  $\mathbf{X} \sim \mathbf{X}'$ ,  $D_{\alpha}(\mathcal{M}(\mathbf{X}) || \mathcal{M}(\mathbf{X}')) \leq \rho \cdot \alpha$  for all  $\alpha > 1$ , where  $D_{\alpha}(\mathcal{M}(\mathbf{X}) || \mathcal{M}(\mathbf{X}'))$  is the  $\alpha$ -Rényi divergence between  $\mathcal{M}(\mathbf{X})$  and  $\mathcal{M}(\mathbf{X}')$ .

The relationship between these DP definitions is as follows. Pure-DP, also written as  $\varepsilon$ -DP, implies  $\frac{\varepsilon^2}{2}$ -zCDP, which further implies  $\left(\frac{\varepsilon^2}{2} + \varepsilon\sqrt{2\log\frac{1}{\delta}}\right)$ -DP for any  $\delta > 0$ .

To preserve  $\varepsilon$ -DP for a query  $Q$ , a standard mechanism is to add independent Laplace noises with scale proportional to the (global)  $\ell_1$ -sensitivity of  $Q$  to each dimension.

**Lemma 1** (Laplace Mechanism [13]). Given  $Q : \mathbb{R}^{d \times n} \rightarrow \mathbb{R}^k$ , let  $\text{GS}_Q := \max_{\mathbf{X} \sim \mathbf{X}'} \|Q(\mathbf{X}) - Q(\mathbf{X}')\|_1$ . The mechanism  $\mathcal{M}(\mathbf{X}) = Q(\mathbf{X}) + \frac{\text{GS}_Q}{\varepsilon} \cdot \mathbf{Y}$  where  $\mathbf{Y} \sim \text{Lap}(1)^k$ , preserves  $\varepsilon$ -DP.

The following composition property of  $\varepsilon$ -DP allows us to design algorithms in a modular fashion.

**Lemma 2** (Basic Composition). If  $\mathcal{M}$  is an adaptive composition of mechanisms  $\mathcal{M}_1, \mathcal{M}_2, \dots, \mathcal{M}_t$ , where each  $\mathcal{M}_i$  satisfies  $\varepsilon_i$ -DP, then  $\mathcal{M}$  satisfies  $(\sum_i \varepsilon_i)$ -DP.

For  $\rho$ -zCDP, the standard method is the *Gaussian mechanism*:

**Lemma 3** (Gaussian Mechanism [10]). Given  $Q : \mathbb{R}^{d \times n} \rightarrow \mathbb{R}^k$ , let  $\text{GS}_Q := \max_{\mathbf{X} \sim \mathbf{X}'} \|Q(\mathbf{X}) - Q(\mathbf{X}')\|_2$ . The mechanism  $\mathcal{M}(\mathbf{X}) = Q(\mathbf{X}) + \frac{\text{GS}_Q}{\sqrt{2\rho}} \cdot \mathbf{Y}$  where  $\mathbf{Y} \sim \mathcal{N}(0, \mathbf{I}_{k \times k})$ , preserves  $\rho$ -zCDP.

It has been shown that the covariance matrix has an  $\ell_2$ -sensitivity of  $\frac{\sqrt{2}}{n}$  [8]. Thus, the Gaussian mechanism for covariance, denoted  $\text{GaussCov}$ , simply adds an independent Gaussian noise with scale  $\frac{1}{\sqrt{\rho n}}$  to each entry of  $\Sigma$ . Considering that  $\Sigma$  is symmetric, symmetric noises also suffice, which preserve the symmetry of the privatized  $\Sigma$ . More precisely, we draw a random noise matrix  $\mathbf{W}$  where  $w_{j,k} \sim \mathcal{N}(0, 1)$  i.i.d. for  $1 \leq j \leq k \leq d$  and  $w_{k,j} = w_{j,k}$ , denoted as  $\mathbf{W} \sim \text{SGW}(d)$ . Then  $\text{GaussCov}$  outputs  $\tilde{\Sigma}_{\text{Gau}} = \Sigma + \frac{1}{\sqrt{\rho n}} \cdot \mathbf{W}$ .

A similar composition property exists for  $\rho$ -zCDP.

**Lemma 4** (Composition Theorem [10]). *If  $\mathcal{M}$  is an adaptive composition of algorithms  $\mathcal{M}_1, \mathcal{M}_2, \dots, \mathcal{M}_t$ , where each  $\mathcal{M}_i$  satisfies  $\rho_i$ -zCDP, then  $\mathcal{M}$  satisfies  $(\sum_i \rho_i)$ -zCDP.*

### 3.2 The Sparse Vector Technique

The *Sparse Vector Technique* (SVT) [14] has as input a sequence of scalar queries,  $f_1(\mathbf{X}), f_2(\mathbf{X}), \dots, f_t(\mathbf{X})$ , where each has sensitivity 1, and a threshold  $T$ . It aims to find the first query (if there is) whose answer is approximately above  $T$ . See Appendix A for the detailed algorithm. The SVT has been shown to satisfy  $\varepsilon$ -DP with following utility guarantee.

**Lemma 5** (Extension of Theorem 3.24 in [16]). *With probability at least  $1 - \beta$ , SVT returns a  $k$  such that, for any  $i < k$ ,  $f_i(\mathbf{X}) \leq T + \frac{6}{\varepsilon} \log(2t/\beta)$ , and if  $k \neq t + 1$ , then  $f_k(\mathbf{X}) \geq T - \frac{6}{\varepsilon} \log(2t/\beta)$ .*

### 3.3 Concentration Inequalities

**Lemma 6** ([26]). *Given  $\mathbf{Y} \sim \mathcal{N}(0, \mathbf{I}_{d \times d})$ , with probability at least  $1 - \beta$ ,*

$$\|\mathbf{Y}\|_2 \leq \eta(d, \beta) := \sqrt{d + 2\sqrt{d \log(1/\beta)} + 2 \log(1/\beta)}.$$

**Lemma 7** ([8, 26]). *Given  $\mathbf{W} \sim \text{SGW}(d)$ , with probability at least  $1 - \beta$ ,*

$$\|\mathbf{W}\|_2 \leq v(d, \beta) := 2\sqrt{d} + 2d^{1/6} \log^{1/3} d + \frac{6(1 + (\log d/d)^{1/3})\sqrt{\log d}}{\sqrt{\log(1 + (\log d/d)^{1/3})}} + 2\sqrt{2 \log(1/\beta)}.$$

*Also, with probability at least  $1 - \beta$ ,*

$$\|\mathbf{W}\|_F \leq \omega(d, \beta) := \sqrt{d^2 + 2\sqrt{d \log(2/\beta)}(1 + \sqrt{2(d-1)}) + 6 \log(2/\beta)}.$$

Ignoring polylogarithmic factors,  $\eta(d, \beta)$  and  $v(d, \beta)$  are both in  $\tilde{O}(\sqrt{d})$ , while  $\omega(d, \beta)$  is in  $\tilde{O}(d)$ . These concentration inequalities are very useful for error analysis. For example, the bound on  $\|\mathbf{W}\|_F$  immediately implies that GaussCov has error  $\frac{1}{\sqrt{\rho n}} \cdot \omega(d, \beta) = \tilde{O}(d/n)$ .

## 4 Trace-sensitive Algorithm

The state-of-the-art trace-sensitive algorithm [2] first obtains an estimate of the eigenvalues, and then iteratively finds the eigenvectors by the exponential mechanism (EM), so we denote this algorithm as EMCov. Under zCDP, it has an error of  $\tilde{O}(d^{3/4} \sqrt{\text{tr}} / \sqrt{n} + \sqrt{d}/n)$ . Below, we present an algorithm that is simpler, faster, and more accurate, improving the trace-dependent term by a  $\sqrt{d}$ -factor.

The first step of our algorithm SeparateCov (shown in Algorithm 1) is basically the same as EMCov, where we obtain an estimate of the eigenvalues with half of the privacy budget. [2] uses the Laplace mechanism for pure-DP; for zCDP, we use the Gaussian mechanism, which relies on the  $\ell_2$ -sensitivity of  $\Lambda$ , which we provide in Lemma 10 in the Appendix B. For the eigenvectors, we use GaussCov to obtain a privatized  $\tilde{\Sigma}_{\text{Gau}}$  with the other half of the privacy budget, and perform an eigendecomposition. Finally, we assemble the eigenvalues of eigenvectors to obtain a privatized  $\tilde{\Sigma}$ . It should be clear that, after computing  $\tilde{\Sigma}$ , SeparateCov just needs two eigendecompositions and one full matrix multiplication, plus some  $O(d^2)$ -time operations. On the other hand, EMCov performs  $O(d)$  eigendecompositions and matrix multiplications, plus a nontrivial sampling procedure for the EM.

That SeparateCov satisfies  $\rho$ -zCDP easily follows from the privacy of the Gaussian mechanism and the composition property. The utility is given by the following theorem:

**Theorem 1.** *Given any  $\rho > 0$ , for any  $\mathbf{X} \in \mathcal{B}_d^n$ , and any  $\beta > 0$ , with probability at least  $1 - \beta$ ,*

$$\text{SeparateCov returns a } \tilde{\Sigma}_{\text{Sep}} \text{ such that } \|\tilde{\Sigma}_{\text{Sep}} - \Sigma\|_F \leq \frac{2^{1.25} \sqrt{\text{tr}}}{\rho^{1/4} \sqrt{n}} \cdot \sqrt{v\left(d, \frac{\beta}{2}\right)} + \frac{\sqrt{2}}{\sqrt{\rho n}} \cdot \eta\left(d, \frac{\beta}{2}\right) = \tilde{O}\left(\frac{d^{1/4} \sqrt{\text{tr}}}{\sqrt{n}} + \frac{\sqrt{d}}{n}\right).$$

---

**Algorithm 1** SeparateCov

---

**Input:** data  $\mathbf{X} \in \mathcal{B}_d^n$ ; privacy parameter  $\rho > 0$ .

- 1:  $\Lambda \leftarrow$  the eigenvalues of  $\Sigma = \frac{1}{n} \mathbf{X} \mathbf{X}^T$
  - 2:  $\tilde{\Lambda}_{\text{Sep}} \leftarrow \Lambda + \frac{\sqrt{2}}{\sqrt{\rho n}} \cdot \mathbf{Y}$ , where  $\mathbf{Y} \sim \mathcal{N}(0, \mathbf{I}_{d \times d})$
  - 3:  $\tilde{\Sigma}_{\text{Gau}} \leftarrow \text{GaussCov}(\mathbf{X}, \frac{\rho}{2})$
  - 4:  $\tilde{\mathbf{P}}_{\text{Sep}} \leftarrow \mathbf{P} \left[ \tilde{\Sigma}_{\text{Gau}} \right]$
  - 5:  $\tilde{\Sigma}_{\text{Sep}} \leftarrow \tilde{\mathbf{P}}_{\text{Sep}} \tilde{\Lambda}_{\text{Sep}} \tilde{\mathbf{P}}_{\text{Sep}}^T$
  - 6: **return**  $\tilde{\Sigma}_{\text{Sep}}$
- 

**Remark** While SeparateCov strictly improves over EMCov, it does not dominate GaussCov: When  $\text{tr} < \tilde{O}(d^{3/2}/n)$ , SeparateCov is better; otherwise, GaussCov is better. EMCov is better than GaussCov for a smaller trace range:  $\text{tr} < \tilde{O}(\sqrt{d}/n)$ .

Theorem 1 implies our worst-case bound by taking  $\text{tr} = 1$ :

**Theorem 2.** Given any  $\rho > 0$ , for any  $\mathbf{X} \in \mathcal{B}_d^n$ , and any  $\beta > 0$ , with probability at least  $1 - \beta$ , SeparateCov returns a  $\tilde{\Sigma}_{\text{Sep}}$  such that  $\|\tilde{\Sigma}_{\text{Sep}} - \Sigma\|_F = \tilde{O}\left(\frac{d^{1/4}}{\sqrt{n}} + \frac{\sqrt{d}}{n}\right)$ .

## 5 Tail-sensitive Algorithm

### 5.1 Clipped Covariance

Clipping is a common technique to reduce the sensitivity of functions at the expense of some bias. Given  $\tau \geq 0$  and a vector  $X \in \mathbb{R}^d$ , let  $\text{Clip}(X, \tau) = \min\left(1, \frac{\tau}{\|X\|_2}\right) \cdot X$ . Similarly, for any  $\mathbf{X} \in \mathbb{R}^{d \times n}$ ,  $\text{Clip}(\mathbf{X}, \tau)$  denotes the matrix whose columns have been clipped to have norm at most  $\tau$ . Clipping can be applied to both GaussCov and SeparateCov with a given  $\tau$ : just run the mechanism on  $\frac{1}{\tau} \cdot \text{Clip}(\mathbf{X}, \tau)$  and scale the result back by  $\tau^2$ . We denote the clipped versions of the two mechanisms as ClipGaussCov and ClipSeparateCov, respectively.

The following lemma bounds the bias caused by clipping in terms of the  $\tau$ -tail as defined in (1).

**Lemma 8.**  $\|\Sigma(\mathbf{X}) - \Sigma(\text{Clip}(\mathbf{X}, \tau))\|_F \leq \frac{1}{n} \sum_i (\|X_i\|_2^2 - \tau^2) \cdot \mathbb{I}(\|X_i\|_2 \geq \tau) \leq \gamma(\mathbf{X}, \tau)$ .

Thus, running the better of ClipGaussCov and ClipSeparateCov yields a total error of  $\text{Noise}(\mathbf{X}, \tau, \rho, \beta) + \gamma(\mathbf{X}, \tau)$ , where

$$\text{Noise}(\mathbf{X}, \tau, \rho, \beta) = \min \left( \frac{\tau^2}{\sqrt{\rho n}} \cdot \omega(d, \beta), \frac{2^{1.25} \tau \sqrt{\text{tr}}}{\rho^{1/4} \sqrt{n}} \cdot \sqrt{v\left(d, \frac{\beta}{2}\right)} + \frac{\sqrt{2} \tau^2}{\sqrt{\rho n}} \cdot \eta\left(d, \frac{\beta}{2}\right) \right), \quad (4)$$

which is the exact version of (2). Note that the trace-sensitive term is only scaled by  $\tau$ , which follows from the proof of Theorem 1 when all  $X_i$  live in  $\tau \cdot \mathcal{B}_d$ .

Ideally, we would like to find the optimal noise-bias trade-off, i.e., achieving an error of  $\min_{\tau} (\text{Noise}(\mathbf{X}, \tau) + \gamma(\mathbf{X}, \tau))$ . Two issues need to be addressed towards this goal: The first, minor, issue is that  $\text{tr}$  is sensitive, so we cannot use it directly to decide whether to use ClipGaussCov or ClipSeparateCov. This can be addressed by using a privatized upper bound of  $\text{tr}$ . The more challenging problem is how to find the optimal  $\tau$  in a DP fashion. This problem has been well studied for the clipped mean estimator [18, 3], where it can be shown that setting  $\tau$  to be the  $\tilde{O}(\sqrt{d})$ -th largest  $\|X_i\|_2$  results in the optimal noise-bias trade-off [18]. Then the problem boils down to finding a privatized quantile, for which multiple solutions exist [18, 12, 32, 6, 37]. For the clipped mean estimator, using such a quantile of the norms results in the optimal trade-off because  $\text{Noise}(\mathbf{X}, \tau)$  takes the simple form  $\tilde{O}(\tau \sqrt{d}/n)$ . In fact, if we only had ClipGaussCov, setting  $\tau$  to be the  $\tilde{O}(d)$ -th largest  $\|X_i\|_2$  would also yield an optimal trade-off, as ClipGaussCov is really just clipped mean in  $d^2$  dimensions. However, due to the trace-sensitive noise term, it is no longer the case. In Appendix F, we give examples showing that no quantile, whose rank may arbitrarily depend on  $d, n, \text{tr}$ , can achieve

an optimal trade-off even ignoring polylogarithmic factors. It thus calls for a new threshold-finding mechanism, which we describe next.

## 5.2 Adaptive Covariance: Finding the Optimal Clipping Threshold

Our basic idea is to try successively smaller values  $\tau = 1, \frac{1}{2}, \frac{1}{4}, \dots$ . As we reduce  $\tau$ , the noise decreases while the bias increases. We should stop when they are approximately balanced, which would yield a near-optimal  $\tau$ .

To do so in a DP manner, we need to quantify the noise and bias. Consider the bias first. Given a  $\tau$ , we divide the interval  $(\tau, 1]$  into sub-intervals  $(\tau, 2\tau], (2\tau, 4\tau], \dots, (\frac{1}{2}, 1]$ . For any  $X \in \mathbf{X}$  such that  $\|X\|_2 \in (2^s, 2^{s+1}]$ , let  $\tilde{X} = \text{Clip}(X, \tau)$  and then by Lemma 8,

$$\|XX^T - \tilde{X}\tilde{X}^T\|_F \leq 2^{2s+2} - \tau^2. \quad (5)$$

That is, clipping  $X$  can at most lead to  $\frac{1}{n} \cdot (2^{2s+2} - \tau^2)$  bias. Besides, since  $\|X\|_2 \in (2^s, 2^{s+1}]$ , we have

$$2^{2s+2} - \tau^2 \leq 2^{2s+2} \leq 2 \cdot \|X\|_2^2. \quad (6)$$

Then, given  $\mathbf{X}$ , for any  $s \in \mathbb{Z}$ , we define  $\text{Count}_s(\mathbf{X}) := |\{X_i : \|X_i\|_2 \in (2^s, 2^{s+1}]\}|$ . It is easy to see for any  $\mathbf{X} \sim \mathbf{X}'$ ,  $\text{Count}_s$  differs by at most 1, so does the sum of any subset of  $\text{Count}_s$ 's. We can define an upper bound on the bias:  $\widehat{\text{Bias}}(\mathbf{X}, \tau) := \frac{1}{n} \cdot \sum_{s=\log_2(\tau)}^{s \leq 0} \text{Count}_s \cdot (2^{2s+2} - \tau^2)$ . Let  $\tilde{\mathbf{X}} = \text{Clip}(\mathbf{X}, \tau)$ . By (5) and (6), we have

$$\frac{1}{n} \|\mathbf{X}\mathbf{X}^T - \tilde{\mathbf{X}}\tilde{\mathbf{X}}^T\| \leq \widehat{\text{Bias}}(\mathbf{X}, \tau) \leq 2 \cdot \gamma(\mathbf{X}, \tau). \quad (7)$$

By the property of  $\text{Count}_s$ 's, given any  $\tau$ , the sensitivity of  $\widehat{\text{Bias}}(\cdot, \tau)$  is bounded by  $\frac{1}{n}$ .

Now we turn to the noise. Recall that  $\text{Noise}(\mathbf{X}, \tau, \rho, \beta)$  is the smaller of two parts. The first part  $\text{GaussNoise}(\tau, \rho, \beta) := \tau^2 \cdot \frac{1}{\sqrt{\rho n}} \cdot \omega(d, \beta)$  is independent of  $\mathbf{X}$ , so can be used directly. The second part depends on  $\text{tr}$ , is thus sensitive. Since its sensitivity is  $\frac{1}{n}$ , we can easily privatize it by adding a Gaussian noise of scale  $\Theta\left(\frac{1}{\sqrt{\rho n}}\right)$ . For technical reasons, we need to use an upper bound, so we add  $\Theta\left(\frac{\log(1/\beta)}{\sqrt{\rho n}}\right)$  to it so as to obtain a privatized  $\hat{\text{tr}} \geq \text{tr}$ . Then we set

$$\text{SeparateNoise}(\hat{\text{tr}}, \tau, \rho, \beta) := \tau \cdot \frac{2^{1.25}\sqrt{\hat{\text{tr}}}}{\rho^{1/4}\sqrt{n}} \cdot \sqrt{v\left(d, \frac{\beta}{2}\right)} + \tau^2 \cdot \frac{\sqrt{2}}{\sqrt{\rho n}} \cdot \eta\left(d, \frac{\beta}{2}\right),$$

and use  $\widehat{\text{Noise}}(\hat{\text{tr}}, \tau, \rho, \beta) := \min(\text{GaussNoise}(\tau, \rho, \beta), \text{SeparateNoise}(\hat{\text{tr}}, \tau, \rho, \beta))$  as a DP upper bound of  $\text{Noise}(\mathbf{X}, \tau, \rho, \beta)$ . Note that given  $\hat{\text{tr}}$ ,  $\widehat{\text{Noise}}(\hat{\text{tr}}, \tau, \rho, \beta)$  is independent of  $\mathbf{X}$ .

Finally, we run SVT on the following sequence of sensitivity-1 queries with  $T = 0$ :

$$\text{Diff}(\mathbf{X}, \hat{\text{tr}}, \tau, \rho, \beta) := n \cdot \left( \widehat{\text{Bias}}(\mathbf{X}, \tau) - \widehat{\text{Noise}}(\hat{\text{tr}}, \tau, \rho, \beta) \right), \tau = 1, \frac{1}{2}, \dots, 2^{-dn}.$$

The SVT would return a  $\tau$  that balances the bias and noise. After finding such a  $\tau$ , we choose to run either  $\text{GaussCov}$  or  $\text{SeparateCov}$  by comparing  $\text{GaussNoise}(\tau, \rho, \beta)$  and  $\text{SeparateNoise}(\hat{\text{tr}}, \tau, \rho, \beta)$ . As the sequence consists of  $dn$  queries, SVT has an error of  $O(\log(dn))$ , which, as we will show, affects the optimality by a logarithmic factor. Meanwhile, the smallest  $\tau$  we search over will induce an additive  $2^{-dn}$  error.

The algorithm above can almost give us the desired error bound in (3), except that one thing may go wrong: The SVT introduces an error that is a logarithmic factor larger than the optimum, but at least  $\tilde{\Omega}(1/n)$ . This would be fine as long as there is one  $X_i$  with  $\|X_i\|_2 \geq \tilde{\Omega}(1)$ , so that the optimum error is  $\tilde{\Omega}(1/n)$ . However, when all the  $X_i$ 's have very small norms, say  $1/n^2$ , the  $\tilde{\Omega}(1/n)$  error from SVT would not preserve optimality. To address this issue, we first find the radius  $\text{rad}(\mathbf{X}) = \max_i \|X_i\|_2$ , and use it to clip  $\mathbf{X}$ . The following lemma shows that, under DP, it is possible to find a 2-approximation of  $\text{rad}(\mathbf{X})$  plus an additive  $b$  so that only  $O(\log \log(1/b))$  vectors are clipped. This allows us to set  $b = 2^{-dn}$  while only incurring an  $O(\log dn)$  error. Nicely, they match the additive and multiplicative errors that already exist from the SVT, so there is no asymptotic degradation in the optimality.

---

**Algorithm 2** AdaptiveCov

---

**Input:** data  $\mathbf{X} \in \mathcal{B}_d^n$ ; privacy parameter  $\rho > 0$ ; high probability parameter  $\beta$ .

```
1:  $\tilde{r} \leftarrow \text{PrivRadius}(\mathbf{X}, \frac{\sqrt{\rho}}{2}, \frac{\beta}{8}, 2^{-2dn})$ 
2:  $\tilde{\mathbf{X}} \leftarrow \text{Clip}(\mathbf{X}, \tilde{r})$ 
3:  $\hat{\text{tr}} \leftarrow \frac{1}{n} \sum_i \|\tilde{X}_i\|_2^2$ 
4:  $\hat{r} \leftarrow \min\left(\hat{\text{tr}} + \frac{2\tilde{r}^2}{\sqrt{\rho n}} \cdot \mathcal{N}(0, 1) + \frac{2\sqrt{2}\tilde{r}^2}{\sqrt{\rho n}} \cdot \sqrt{\log(8/\beta)}, \tilde{r}^2\right)$ 
5:  $\tilde{t} \leftarrow \log_2(\tilde{r}) + 1 - \text{SVT}\left(\left\{\text{Diff}\left(\tilde{\mathbf{X}}, \hat{\text{tr}}, \tilde{r}, \frac{\rho}{2}, \frac{\beta}{2}\right), \text{Diff}\left(\tilde{\mathbf{X}}, \hat{\text{tr}}, \frac{\tilde{r}}{2}, \frac{\rho}{2}, \frac{\beta}{2}\right), \dots, \text{Diff}\left(\tilde{\mathbf{X}}, \hat{\text{tr}}, 2^{-dn}, \frac{\rho}{2}, \frac{\beta}{2}\right)\right\}, 0, \frac{\sqrt{\rho}}{\sqrt{2}}\right)$ 
6:  $\tilde{r} \leftarrow \min\left(2^{\tilde{t}+1}, \tilde{r}\right)$ 
7: if  $\text{SeparateNoise}(\hat{\text{tr}}, \tilde{r}, \frac{\rho}{2}, \frac{\beta}{2}) \geq \text{GaussNoise}(\tilde{r}, \frac{\rho}{2}, \frac{\beta}{2})$ 
8:    $\tilde{\Sigma}_{\text{Ada}} \leftarrow \text{ClipGaussCov}(\tilde{\mathbf{X}}, \frac{\rho}{2}, \tilde{r})$ 
9: else
10:   $\tilde{\Sigma}_{\text{Ada}} \leftarrow \text{ClipSeparateCov}(\tilde{\mathbf{X}}, \frac{\rho}{2}, \tilde{r})$ 
11: return  $\tilde{\Sigma}_{\text{Ada}}$ 
```

---

**Lemma 9** ([12]). *For any  $\varepsilon > 0$ ,  $\beta > 0$  and  $b > 0$ , given  $\mathbf{X} \in \mathcal{B}_d^n$ , with probability at least  $1 - \beta$ ,  $\text{PrivRadius}$  returns a  $\tilde{r} = \text{PrivRadius}(\mathbf{X}, \varepsilon, \beta, b)$  such that  $\tilde{r} \leq 2 \cdot \text{rad}(\mathbf{X}) + b$  and  $|\{\|X_i\|_2 > \tilde{r}\}| = O\left(\frac{1}{\varepsilon} \log \frac{\log(\text{rad}(\mathbf{X})/b)}{\beta}\right)$ .*

The complete algorithm is given in Algorithm 2. Its privacy follows from the privacy of  $\text{PrivRadius}$ ,  $\text{SVT}$ ,  $\text{GaussCov}$ ,  $\text{SeparateCov}$ , and the composition theorem of  $\text{zCDP}$ ; its utility is analyzed in the following theorem:

**Theorem 3.** *Given any  $\rho > 0$  and  $\beta > 0$ , for any  $\mathbf{X} \in \mathcal{B}_d^n$ , with probability at least  $1 - \beta$ ,  $\text{AdaptiveCov}$  returns a  $\tilde{\Sigma}_{\text{Ada}}$  such that*

$$\begin{aligned} \|\tilde{\Sigma}_{\text{Ada}} - \Sigma\|_F &= O\left(\min_{\tau} \left(\text{Noise}\left(\mathbf{X}, \tau, \frac{\rho}{2}, \frac{\beta}{2}\right) \cdot \frac{\log(1/\beta)^{1/4}}{\rho^{1/4}} \cdot \log(n) + \gamma(\mathbf{X}, \tau) \cdot \frac{\log(dn/\beta)}{\sqrt{\rho}}\right) + 2^{-dn}\right) \\ &= \tilde{O}\left(\min_{\tau} (\text{Noise}(\mathbf{X}, \tau) + \gamma(\mathbf{X}, \tau)) + 2^{-dn}\right). \end{aligned}$$

## 6 Experiments

We conducted experiments<sup>5</sup> to evaluate our algorithms on both synthetic and real-world datasets. We compare  $\text{SeparateCov}$  and  $\text{AdaptiveCov}$  against  $\text{GaussCov}$  [17],  $\text{EMCov}$  [2]. We implemented  $\text{EMCov}$  in Python following the pseudo-code provided in [2] and the descriptions of the sampling algorithm in [24]. We also tested  $\text{CoinPress}$  [8], but since it is designed to minimize the Mahalanobis error, it does not perform well when measured in Frobenius error. The two distance measures coincide when  $\Sigma$  is well-conditioned but in this case,  $\text{CoinPress}$  degenerates into  $\text{GaussCov}$ . Therefore, we omit it from the reported results. As a baseline, we include returning a zero matrix, which has error  $O(\text{tr})$ , hence a trivial trace-sensitive algorithm. When  $\text{rad}(\mathbf{X})$  is much smaller than 1, it is unfair for  $\text{GaussCov}$  and  $\text{EMCov}$ , so we scale all datasets such that  $0.5 \leq \text{rad}(\mathbf{X}) \leq 1$ . As a result, we do not need the step to obtain a private radius in  $\text{AdaptiveCov}$ , either. Each experiment is repeated 50 times, and we report the average error. Furthermore, we have also conducted experiments under pure-DP; the results can be found in Appendix J.

### 6.1 Synthetic Datasets

We generate synthetic datasets by first following the method in [2], to obtain a matrix  $\mathbf{X} = \mathbf{Z}\mathbf{U}$ , where  $\mathbf{U} \in \mathbb{R}^{d \times d}$  is sampled from  $U(0, 1)$ , and  $\mathbf{Z} \in \mathbb{R}^{n \times d}$  is sampled from  $\mathcal{N}(0, \mathbf{I})$ . Then the vectors in  $\mathbf{X}$  are adjusted to be centred at 0 and their norms scaled. In [2], the vectors are scaled to have unit  $\ell_2$  norm; in our experiments, to better control  $\text{tr}$  and data skewness, we scale the norms so that they

---

<sup>5</sup>The code can be found at <https://github.com/hkustDB/PrivateCovariance>.



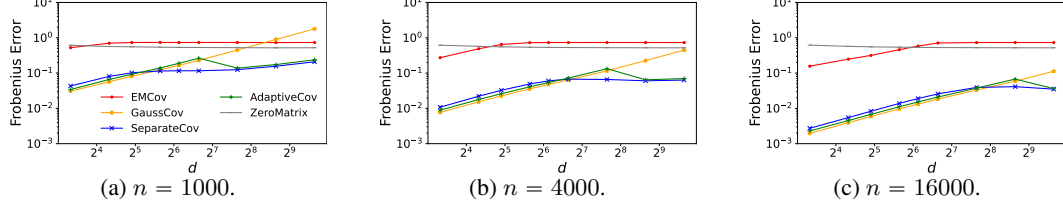

Figure 2: Results on synthetic datasets fixing  $\text{tr} = 1$ .

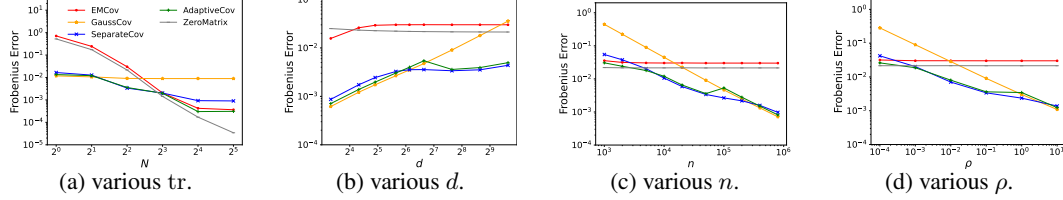

Figure 3: Results on synthetic datasets as  $d, n, N$  or  $\rho$  varies.

follow the Zipf's law. More precisely, we divide the norms into  $N$  bins. The number of vectors in the  $k$ -th bin is proportional to  $1/k^s$  and their norm is  $2^{k-N}$ . The parameter  $s$  characterizes the skewness, which we fix as  $s = 3$ . Note that  $N = 1$  corresponds to the unit-norm case with  $\text{tr} = 1$ .

The results on  $\text{tr} = 1$  case are shown in Figure 2, which correspond to the worst-case bounds. The  $\rho$  here is fixed at 0.1 and we examine the error growth w.r.t.  $d$  for  $n = 1000, 4000, 16000$ . The results generally agree with the theory: For low  $d$ , GaussCov is (slightly) better than SeparateCov, while the latter is much better for high  $d$ . AdaptiveCov is able to choose the better of the two adaptively, with a small cost due to allocating some privacy budget to estimate  $\text{tr}$ . Actually, if AdaptiveCov is given the precondition that all norms are 1, this extra cost can be saved.

Next, we vary one of the parameters while fixing the others at their default values  $d = 200, n = 50000, N = 4$  and  $\rho = 0.1$ , and the results are reported in Figure 3. The most interesting case is Figure 3(a), where we increase  $N$ , hence reducing  $\text{tr}$ , which demonstrates the trace-sensitive bounds. Clearly, GaussCov is not trace-sensitive, while the other 4 methods are. In fact, returning the zero matrix is the best trace-sensitive algorithm if  $\text{tr}$  is sufficiently small. However, this may not be very meaningful in practice, as  $N = 2^5$  means that most data have norm  $2^{-31}$  but a few have norm 1. These few may be outliers and should be removed anyway. Figure 3(b)–(d) shows that higher  $d$ , smaller  $n$ , and smaller  $\rho$  all have similar effects, i.e., SeparateCov becomes better while GaussCov becomes worse, while AdaptiveCov is able to pick the better one.

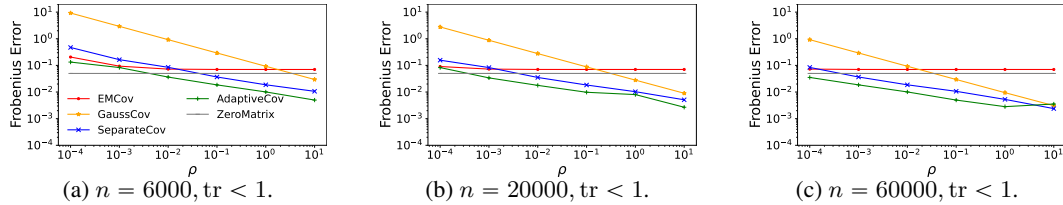

Figure 4: Results on MNIST dataset.

## 6.2 Real-world Datasets

We also evaluate the algorithms on two real-world datasets. The first dataset is the MNIST [27] dataset, which contains images of handwritten digits. We use its training dataset which contains 60,000 images represented as vectors in  $\mathbb{Z}_{255}^d$ , where  $d = 784 = 28 \times 28$ . These vectors are normalized by  $255\sqrt{d}$  in the experiments. We estimate  $\tilde{\Sigma}$  using samples containing all the digits, we also estimate  $\tilde{\Sigma}$  corresponding to individual digits (reported in the Appendix J). In the first case,  $\tilde{\Sigma}$  can be used for further dimensionality reduction analysis; in the second case, individual  $\tilde{\Sigma}$  can be used for modelling the distributions of individual digits, which together can be used in a collective

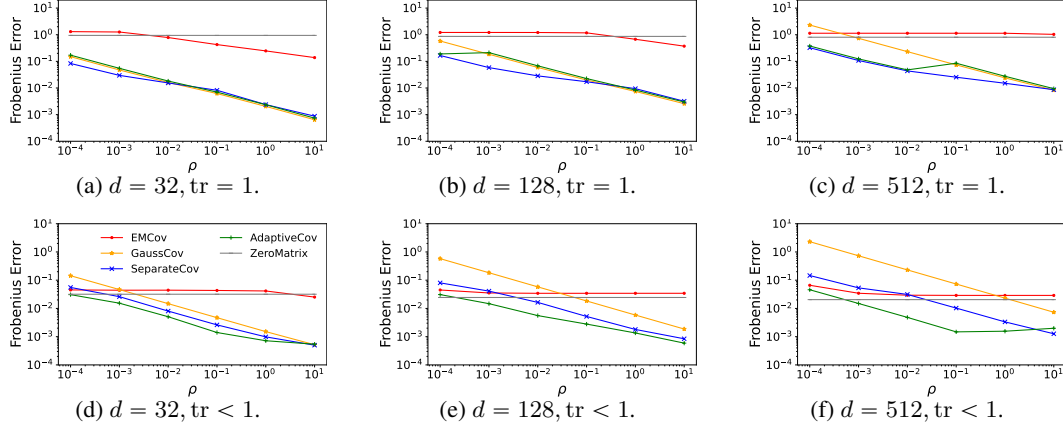

Figure 5: Results on the news dataset.

model for classification (e.g. using a mixture model). The second dataset contains news commentary data [33] consisting of approximately 15,000 articles, each containing 500 – 4300 words, which we convert into vectors of various dimensions using the hashing trick implemented in the scikit-learn package. In this case, the estimated  $\tilde{\Sigma}$  can be used to help with further feature selection for NLP models, for example. These vectors are normalized to have unit  $\ell_2$  norm or normalized by the max  $\ell_2$  norm.

The experimental results on these two real dataset are shown in Figure 4 and 5, where we vary  $n$ ,  $d$ , and  $\rho$ , respectively. On these results, we see that GaussCov never outperforms SeparateCov, except for a very small advantage in a few cases where we have  $\text{tr} = 1$ , a low  $d$ , and a high  $\rho$ . Another interesting observation is that AdaptiveCov outperforms both GaussCov and SeparateCov in many cases, something that is not apparent on the synthetic datasets. We believe that this is because these real datasets have heavier tails than the Zipf distribution (we used  $s = 3$  for Zipf), which makes the adaptive clipping threshold selection more effective. This really demonstrates the benefits of a tail-sensitive bound.

## Acknowledgements

This work has been supported by HKRGC under grants 16201819, 16205420, and 16205422. We would like to thank Aleksandar Nikolov for helpful discussions on the projection mechanism and the anonymous reviewers who have made valuable suggestions on improving the presentation of the paper.

## References

- [1] Ishaq Aden-Ali, Hassan Ashtiani, and Gautam Kamath. On the sample complexity of privately learning unbounded high-dimensional gaussians. In *Algorithmic Learning Theory*, pages 185–216. PMLR, 2021.
- [2] Kareem Amin, Travis Dick, Alex Kulesza, Andrés Munoz Medina, and Sergei Vassilvitskii. Differentially private covariance estimation. In *NeurIPS*, pages 14190–14199, 2019.
- [3] Kareem Amin, Alex Kulesza, Andres Munoz, and Sergei Vassilvitskii. Bounding user contributions: A bias-variance trade-off in differential privacy. In *International Conference on Machine Learning*, pages 263–271. PMLR, 2019.
- [4] Galen Andrew, Om Thakkar, Brendan McMahan, and Swaroop Ramaswamy. Differentially private learning with adaptive clipping. *Advances in Neural Information Processing Systems*, 34, 2021.
- [5] Hassan Ashtiani and Christopher Liaw. Private and polynomial time algorithms for learning gaussians and beyond. In *Conference on Learning Theory*, pages 1075–1076. PMLR, 2022.

- [6] Hilal Asi and John C Duchi. Instance-optimality in differential privacy via approximate inverse sensitivity mechanisms. *Advances in neural information processing systems*, 33, 2020.
- [7] Afonso S Bandeira and Ramon Van Handel. Sharp nonasymptotic bounds on the norm of random matrices with independent entries. *The Annals of Probability*, 44(4):2479–2506, 2016.
- [8] Sourav Biswas, Yihe Dong, Gautam Kamath, and Jonathan Ullman. Coinpress: Practical private mean and covariance estimation. *Advances in Neural Information Processing Systems*, 33, 2020.
- [9] Mark Bun, Gautam Kamath, Thomas Steinke, and Steven Z Wu. Private hypothesis selection. *Advances in Neural Information Processing Systems*, 32, 2019.
- [10] Mark Bun and Thomas Steinke. Concentrated differential privacy: Simplifications, extensions, and lower bounds. In *Theory of Cryptography Conference*, pages 635–658. Springer, 2016.
- [11] Kamalika Chaudhuri, Anand D Sarwate, and Kaushik Sinha. A near-optimal algorithm for differentially-private principal components. *Journal of Machine Learning Research*, 14, 2013.
- [12] Wei Dong and Ke Yi. Universal private estimators. *arXiv preprint arXiv:2111.02598*, 2021.
- [13] Cynthia Dwork, Frank McSherry, Kobbi Nissim, and Adam Smith. Calibrating noise to sensitivity in private data analysis. In *Theory of cryptography conference*, pages 265–284. Springer, 2006.
- [14] Cynthia Dwork, Moni Naor, Omer Reingold, Guy N Rothblum, and Salil Vadhan. On the complexity of differentially private data release: efficient algorithms and hardness results. In *Proceedings of the forty-first annual ACM symposium on Theory of computing*, pages 381–390, 2009.
- [15] Cynthia Dwork, Aleksandar Nikolov, and Kunal Talwar. Efficient algorithms for privately releasing marginals via convex relaxations. *Discrete & Computational Geometry*, 53(3):650–673, 2015.
- [16] Cynthia Dwork and Aaron Roth. The algorithmic foundations of differential privacy. *Foundations and Trends® in Theoretical Computer Science*, 9(3–4):211–407, 2014.
- [17] Cynthia Dwork, Kunal Talwar, Abhradeep Thakurta, and Li Zhang. Analyze gauss: optimal bounds for privacy-preserving principal component analysis. In *Proceedings of the forty-sixth annual ACM symposium on Theory of computing*, pages 11–20, 2014.
- [18] Ziyue Huang, Yuting Liang, and Ke Yi. Instance-optimal mean estimation under differential privacy. *Advances in Neural Information Processing Systems*, 2021.
- [19] Gautam Kamath, Jerry Li, Vikrant Singhal, and Jonathan Ullman. Privately learning high-dimensional distributions. In *Proceedings of the 32nd Annual Conference on Learning Theory, COLT ’19*, pages 1853–1902, 2019.
- [20] Gautam Kamath, Argyris Mouzakis, and Vikrant Singhal. New lower bounds for private estimation and a generalized fingerprinting lemma. *arXiv preprint arXiv:2205.08532*, 2022.
- [21] Gautam Kamath, Argyris Mouzakis, Vikrant Singhal, Thomas Steinke, and Jonathan Ullman. A private and computationally-efficient estimator for unbounded gaussians. In *Conference on Learning Theory*, pages 544–572. PMLR, 2022.
- [22] Michael Kapralov and Kunal Talwar. On differentially private low rank approximation. In *Proceedings of the twenty-fourth annual ACM-SIAM symposium on Discrete algorithms*, pages 1395–1414. SIAM, 2013.
- [23] Shiva Prasad Kasiviswanathan, Mark Rudelson, Adam Smith, and Jonathan Ullman. The price of privately releasing contingency tables and the spectra of random matrices with correlated rows. In *Proceedings of the forty-second ACM symposium on Theory of computing*, pages 775–784, 2010.

- [24] John T Kent, Asaad M Ganeiber, and Kanti V Mardia. A new unified approach for the simulation of a wide class of directional distributions. *Journal of Computational and Graphical Statistics*, 27(2):291–301, 2018.
- [25] Pravesh Kothari, Pasin Manurangsi, and Ameya Velingker. Private robust estimation by stabilizing convex relaxations. In *Conference on Learning Theory*, pages 723–777. PMLR, 2022.
- [26] Beatrice Laurent and Pascal Massart. Adaptive estimation of a quadratic functional by model selection. *Annals of Statistics*, pages 1302–1338, 2000.
- [27] Yann LeCun, Corinna Cortes, and Christopher J.C. Burges. The mnist database of handwritten digits, 1998. Available online at: <http://yann.lecun.com/exdb/mnist/>. Last accessed: May, 2022.
- [28] Xiyang Liu, Weihao Kong, and Sewoong Oh. Differential privacy and robust statistics in high dimensions. In *Conference on Learning Theory*, pages 1167–1246. PMLR, 2022.
- [29] H Brendan McMahan, Daniel Ramage, Kunal Talwar, and Li Zhang. Learning differentially private recurrent language models. *arXiv preprint arXiv:1710.06963*, 2017.
- [30] Aleksandar Nikolov. Private query release via the johnson-lindenstrauss transform. *arXiv preprint arXiv:2208.07410*, 2022.
- [31] Aleksandar Nikolov, Kunal Talwar, and Li Zhang. The geometry of differential privacy: the sparse and approximate cases. In *Proceedings of the forty-fifth annual ACM symposium on Theory of computing*, pages 351–360, 2013.
- [32] Kobbi Nissim, Sofya Raskhodnikova, and Adam Smith. Smooth sensitivity and sampling in private data analysis. In *Proceedings of the thirty-ninth annual ACM symposium on Theory of computing*, pages 75–84, 2007.
- [33] Sixth Conference on Machine Translation WMT21. News commentary crawl v16, 2021. Available online at: <https://www.statmt.org/wmt20/translation-task.html>. Last accessed: May, 2022.
- [34] Venkatadheeraj Pichapati, Ananda Theertha Suresh, Felix X Yu, Sashank J Reddi, and Sanjiv Kumar. Adaclip: Adaptive clipping for private sgd. *arXiv preprint arXiv:1908.07643*, 2019.
- [35] Holger Sambale. Some notes on concentration for  $\alpha$ -subexponential random variables. *arXiv preprint arXiv:2002.10761*, 2020.
- [36] Vikrant Singhal and Thomas Steinke. Privately learning subspaces. *Advances in Neural Information Processing Systems*, 34:1312–1324, 2021.
- [37] Adam Smith. Privacy-preserving statistical estimation with optimal convergence rates. In *Proceedings of the forty-third annual ACM symposium on Theory of computing*, pages 813–822, 2011.
- [38] Jalaj Upadhyay. The price of privacy for low-rank factorization. In *NeurIPS*, 2018.
- [39] Martin J Wainwright. *High-dimensional statistics: A non-asymptotic viewpoint*, volume 48. Cambridge University Press, 2019.

---

**Algorithm 3** SVT

---

**Input:** query sequence  $(f_1(\mathbf{X}), \dots, f_t(\mathbf{X}))$ ; threshold  $T$ ; privacy parameter  $\varepsilon > 0$ .

**Output:** index  $k$

```

1:  $\tilde{T} \leftarrow T + \text{Lap}(2/\varepsilon)$ 
2: for  $k \leftarrow 1, 2, \dots, t$ 
3:   if  $f_k(\mathbf{X}) + \text{Lap}(4/\varepsilon) \geq \tilde{T}$ 
4:     return  $k$ 
5: return  $t + 1$ 

```

---

## A Sparse Vector Technique

The SVT is shown in Algorithm 3.

## B Technical Lemmata

**Lemma 10.** For any  $\mathbf{X}, \mathbf{X}' \in \mathcal{B}_d^n$ ,  $\mathbf{X} \sim \mathbf{X}'$ ,

$$\|\mathbf{\Lambda} - \mathbf{\Lambda}'\|_F \leq \frac{\sqrt{2}}{n}.$$

*Proof.* The proof of this lemma requires the following technical result.

**Fact 1.** Let  $a_k, b_k \geq c_k \geq 0$  for  $1 \leq k \leq d$ . Then

$$\sum_{k=1}^d (a_k - b_k)^2 \leq \left( \sum_{k=1}^d (a_k - c_k) \right)^2 + \left( \sum_{k=1}^d (b_k - c_k) \right)^2.$$

Let  $f_k : \mathcal{B}(r)^n \rightarrow \mathbb{R}_{\geq 0}$  be defined as  $f_k(\mathbf{X}) = \lambda_k(\frac{1}{n}\mathbf{X}\mathbf{X}^T)$ . Suppose  $\mathbf{X}$  and  $\mathbf{X}'$  differ in the  $i^{\text{th}}$  column. Let  $\mathbf{X}_{(-i)}$  denote the matrix obtained from  $\mathbf{X}$  by removing the  $i^{\text{th}}$  column. Then  $f_k(\mathbf{X}) = \lambda_k \left[ \frac{1}{n}\mathbf{X}_{(-i)}\mathbf{X}_{(-i)}^T + \frac{1}{n}X_iX_i^T \right]$ . Note that  $X_iX_i^T$  is a rank-one matrix with eigenvalues 0 and  $\|X_i\|_2^2$ , so by Weyl's inequality  $f_k(\mathbf{X}_{(-i)}) \leq f_k(\mathbf{X})$  and  $f_k(\mathbf{X}_{(-i)}) \leq f_k(\mathbf{X}')$ . We have

$$\begin{aligned}
\sum_{k=1}^d (f_k(\mathbf{X}) - f_k(\mathbf{X}_{(-i)})) &= \sum_{k=1}^d f_k(\mathbf{X}) - \sum_{k=1}^d f_k(\mathbf{X}_{(-i)}) \\
&= \text{tr} \left[ \frac{1}{n}\mathbf{X}\mathbf{X}^T \right] - \text{tr} \left[ \frac{1}{n}\mathbf{X}_{(-i)}\mathbf{X}_{(-i)}^T \right] \\
&= \frac{1}{n}\|X_i\|_2^2 \leq \frac{1}{n}.
\end{aligned}$$

Similarly,  $\sum_{k=1}^d (f_k(\mathbf{X}') - f_k(\mathbf{X}_{(-i)})) \leq \frac{1}{n}$ . Now by Fact 1, with  $a_k = f_k(\mathbf{X})$ ,  $b_k = f_k(\mathbf{X}')$  and  $c_k = f_k(\mathbf{X}_{(-i)})$ , we have

$$\begin{aligned}
\sum_{k=1}^d (f_k(\mathbf{X}) - f_k(\mathbf{X}'))^2 &\leq \left( \sum_{k=1}^d (f_k(\mathbf{X}) - f_k(\mathbf{X}_{(-i)})) \right)^2 + \left( \sum_{k=1}^d (f_k(\mathbf{X}') - f_k(\mathbf{X}_{(-i)})) \right)^2 \\
&\leq \left( \frac{1}{n} \right)^2 + \left( \frac{1}{n} \right)^2 = \frac{2}{n^2}.
\end{aligned} \tag{8}$$

Taking the square root on both sides then gives the target inequality.  $\square$

## C zCDP error bound for EMCov

The state-of-the-art trace-sensitive algorithm [2] has error  $\tilde{O} \left( \sqrt{d \sum_{i=1}^d (\lambda_i/\varepsilon_i)} + \sqrt{d} \right)$ . Under pure-DP, setting  $\varepsilon_i = \varepsilon/d$  for all  $i$  turns the bound into  $\tilde{O}(d\sqrt{\text{tr}} + \sqrt{d})$ . For zCDP, we can set

$\varepsilon_i = \tilde{O}(\sqrt{\rho/d})$ , which implies  $\frac{\rho}{d}$ -zCDP. Then the whole process follows  $\rho$ -zCDP by composition. Alternatively, one could adaptively set  $\varepsilon_i$  according to a privatized  $\lambda_i$  as mentioned in [2], but we do not consider this optimization as it does not yield a better trace-sensitive bound. Also, as observed from their experiments [2], this optimization does not have a big effect on the performance of their algorithm.

The algorithm in [2] estimates  $\Sigma = \mathbf{X}\mathbf{X}^T$ . The  $\frac{1}{n}$  normalization factor scales down both the error and  $\text{tr}$  by a factor of  $n$ . This yields the stated bounds in Section 1.1 and I.

## D The lower bound of mean estimation from statistical setting to empirical setting

[19] considers the statistical setting, where each  $X_i \sim \mathcal{P}$  and  $\mathcal{P}$  is a distribution over  $\{-1, 1\}^d$  and show the lower bound of  $(\varepsilon, \delta)$ -DP for  $\delta \leq \frac{\varepsilon}{64n}$  is  $\Omega(\frac{d}{\varepsilon n})$  (see Lemma 6.2 in that paper). Since zCDP implies approximate-DP and each instance under statistical setting is naturally a case under empirical setting, their lower bound implies the one of zCDP under empirical setting. Besides, under their setting, data have the  $\ell_2$  norm equal to  $\sqrt{d}$ . Scaling the result by  $\sqrt{d}$  and we get the lower bound under our setting.

## E Applying the projection mechanism to covariance estimation

Similar as SeparateCov, the projection mechanism first constructs  $\tilde{\Sigma}_{\text{Gau}}$  by adding Gaussian noise on  $\Sigma$ . Let  $K$  be the set of covariance matrices for all possible datasets  $\mathbf{X}$ , i.e.,

$$K = \{\Sigma(\mathbf{X}) : \mathbf{X} \in (\mathcal{B}_d)^n\}.$$

The projection mechanism return a  $\bar{\Sigma}$  such that,

$$\bar{\Sigma} = \arg \min_{\bar{\Sigma} \in K} \|\bar{\Sigma} - \tilde{\Sigma}_{\text{Gau}}\|_F. \quad (9)$$

For the privacy, projection mechanism does some post-processing on  $\tilde{\Sigma}_{\text{Gau}}$  thus naturally preserves DP. For the utility, by Lemma 1 of [31],  $\|\Sigma - \bar{\Sigma}\|_F$  is bounded by maximum eigenvalue of noise matrix added in  $\tilde{\Sigma}_{\text{Gau}}$ , which is further bounded by  $\tilde{O}(\sqrt{d})$  by Lemma 7. For the efficiency, after using obtaining  $\tilde{\Sigma}_{\text{Gau}}$ , which requires time  $O(n + d^2)$ , the projection mechanism uses Frank-Wolfe algorithm to solve the optimal projection of  $\tilde{\Sigma}_{\text{Gau}}$  on  $K$ , where there are  $n$  iterations with each one requires computing the SVD of a PSD matrix and the total running time is  $O(nd^3)$ . Below, we show that optimal projection can be solved by only computing one SVD thus the cost can be reduced to  $O(d^3)$ .

**Lemma 11.** *Let  $\mathbf{B}$  be a symmetric  $d \times d$  matrix with  $\mathbf{B} = \mathbf{P}\mathbf{U}\mathbf{P}^T$ , and  $K$  is defined as (9). Then there is  $\mathbf{A}' \in \arg \min_{\mathbf{A} \in K} \|\mathbf{B} - \mathbf{A}\|_F$  where  $\mathbf{A}' = \mathbf{P}\mathbf{U}'\mathbf{P}^T$  for some diagonal matrix  $\mathbf{U}' \geq 0$ .*

*Proof.* It suffices to show for any  $\mathbf{A} \in K$ , we can find a such  $\mathbf{A}'$  and  $\|\mathbf{B} - \mathbf{A}'\|_F \leq \|\mathbf{B} - \mathbf{A}\|_F$ .

Let  $\mathbf{U}' = \text{diag}(\mathbf{P}^T \mathbf{A} \mathbf{P})$ , then,  $\text{tr}(\mathbf{U}') = \text{tr}(\mathbf{P}^T \mathbf{A} \mathbf{P}) = \text{tr}(\mathbf{A}) \leq 1$ . Also,  $U'_{i,i} = P_i^T \mathbf{A} P_i \leq \lambda_1(\mathbf{A}) \leq 1$  and  $U'_{i,i} = P_i^T \mathbf{A} P_i \geq 0$  since  $\mathbf{A}$  is PSD. Overall,  $\mathbf{A}' \in K$ .

Furthermore,

$$\begin{aligned} \|\mathbf{B} - \mathbf{A}\|_F^2 &= \|\mathbf{P}\mathbf{U}\mathbf{P}^T - \mathbf{A}\|_F^2 \\ &= \|\mathbf{U} - \mathbf{P}^T \mathbf{A} \mathbf{P}\|_F^2 \\ &= 2 \sum_{i < j} (\mathbf{P}^T \mathbf{A} \mathbf{P})_{i,j}^2 + \sum_i (U_{i,i} - (\mathbf{P}^T \mathbf{A} \mathbf{P})_{i,i})^2 \\ &\geq \sum_i (U_{i,i} - (\mathbf{P}^T \mathbf{A} \mathbf{P})_{i,i})^2 \\ &= \sum_i (U_{i,i} - U'_{i,i})^2 \end{aligned}$$

$$=\|\mathbf{B}-\mathbf{A}'\|_F^2$$

□

Let  $\tilde{\Sigma}_{\text{Gau}} = \tilde{P}\tilde{\Lambda}\tilde{P}^T$  and  $\tilde{\Lambda} = \text{diag}(\tilde{\Lambda}_1, \dots, \tilde{\Lambda}_d)$ . From Lemma 11, to find  $\arg \min_{\tilde{\Sigma} \in K} \|\tilde{\Sigma} - \tilde{\Sigma}_{\text{Gau}}\|_F$ , it suffices to find a diagonal matrix  $\mathbf{U}$  such that  $0 \leq U_{i,i}$ ,  $\sum_i U_i \leq 1$  and  $\sum_i (\tilde{\Lambda}_{i,i} - U_{i,i})^2$  is minimized.

## F On quantile-based truncation thresholds

Given that quantile-based thresholds have been used for mean estimation, one might ask whether such a threshold exists for covariance estimation, where  $\tau$  corresponds to some  $g(d, n, \text{tr})$ th quantile of the  $\ell_2$  norms of the vectors, for some function  $g(\cdot)$ . In this section, we provide a counterexample to show that there is no universal optimal quantile which works in all cases. Specifically, we construct two datasets with the same  $d$ ,  $n$ , and  $\text{tr}$  whose optimal quantile-based thresholds are asymptotically different. Let  $d = \Theta(n^{9/16})$ ,  $\text{tr} = \frac{d}{n} = \Theta(n^{-7/16})$ . With such setting, SeparateCov performs better than GaussCov.

For the first dataset, we have  $n^{9/16}$  number of vectors with  $\ell_2$  norm equal to one while all others have norm zero. In this case, we have 1 and 0 as the only candidate truncation thresholds. Using  $\tau = 1$  gives an error of  $\Theta(n^{-37/64})$  and while  $\tau = 0$  corresponds to an error of  $\Theta(n^{-7/16})$ . Thus,  $\tau = 1$  should be used, which corresponds a quantile between the 0th and  $n^{9/16}$ th.

For the second dataset, we have  $O(1)$  number of vectors with  $\ell_2$  norm square equal to one,  $n^{19/32}$  number of vectors with  $\ell_2$  norm square equal to  $n^{-13/32}$  and all others have  $\ell_2$  norm square equal to  $n^{-7/16}$ . Here, we have three candidates: 1,  $n^{-13/64}$  and  $n^{-7/32}$ .  $\tau = 1$  corresponds to the error  $\Theta(n^{-37/64})$ .  $\tau = n^{-13/64}$  corresponds to the error  $\Theta(n^{-25/32})$ .  $\tau = n^{-7/32}$  corresponds to the error  $\Theta(n^{-51/64})$ . Thus, we should choose  $\tau = n^{-7/32}$ , which corresponds to a quantile between the  $(\tilde{O}(1) + n^{19/32})$ th and  $n$ th.

## G Proofs for Trace-sensitive Algorithm

**Theorem 1.** *Given any  $\rho > 0$ , for any  $\mathbf{X} \in \mathcal{B}_d^n$ , and any  $\beta > 0$ , with probability at least  $1 - \beta$ , SeparateCov returns a  $\tilde{\Sigma}_{\text{Sep}}$  such that  $\|\tilde{\Sigma}_{\text{Sep}} - \Sigma\|_F \leq \frac{2^{1.25}\sqrt{\text{tr}}}{\rho^{1/4}\sqrt{n}} \cdot \sqrt{v\left(d, \frac{\beta}{2}\right)} + \frac{\sqrt{2}}{\sqrt{\rho n}} \cdot \eta\left(d, \frac{\beta}{2}\right) = \tilde{O}\left(\frac{d^{1/4}\sqrt{\text{tr}}}{\sqrt{n}} + \frac{\sqrt{d}}{n}\right)$ .*

*Proof.* The error can be decomposed into two parts:

$$\begin{aligned} \|\tilde{\Sigma}_{\text{Sep}} - \Sigma\|_F &= \|\tilde{\mathbf{P}}_{\text{Sep}}\tilde{\Lambda}_{\text{Sep}}\tilde{\mathbf{P}}_{\text{Sep}}^T - \Sigma\|_F \\ &= \|\tilde{\mathbf{P}}_{\text{Sep}}(\tilde{\Lambda}_{\text{Sep}} - \Lambda)\tilde{\mathbf{P}}_{\text{Sep}}^T + \tilde{\mathbf{P}}_{\text{Sep}}\Lambda\tilde{\mathbf{P}}_{\text{Sep}}^T - \Sigma\|_F \\ &\leq \|\tilde{\mathbf{P}}_{\text{Sep}}(\tilde{\Lambda}_{\text{Sep}} - \Lambda)\tilde{\mathbf{P}}_{\text{Sep}}^T\|_F + \|\tilde{\mathbf{P}}_{\text{Sep}}\Lambda\tilde{\mathbf{P}}_{\text{Sep}}^T - \Sigma\|_F. \end{aligned}$$

For the first term, by Lemma 6, we have with probability at least  $1 - \frac{\beta}{2}$ ,

$$\|\tilde{\mathbf{P}}_{\text{Sep}}(\tilde{\Lambda}_{\text{Sep}} - \Lambda)\tilde{\mathbf{P}}_{\text{Sep}}^T\|_F = \|\tilde{\Lambda}_{\text{Sep}} - \Lambda\|_F = \frac{\sqrt{2}}{\sqrt{\rho n}} \cdot \|\mathbf{Y}\|_2 = \frac{\sqrt{2}}{\sqrt{\rho n}} \cdot \eta(d, \beta).$$

For the second term,

$$\begin{aligned} \|\tilde{\mathbf{P}}_{\text{Sep}}\Lambda\tilde{\mathbf{P}}_{\text{Sep}}^T - \Sigma\|_F^2 &= \|\tilde{\mathbf{P}}_{\text{Sep}}\Lambda\tilde{\mathbf{P}}_{\text{Sep}}^T\|_F^2 + \|\Sigma\|_F^2 - 2 \cdot \text{tr}\left(\Sigma\tilde{\mathbf{P}}_{\text{Sep}}\Lambda\tilde{\mathbf{P}}_{\text{Sep}}^T\right) \\ &= 2 \sum_j \lambda_j^2 - 2 \cdot \text{tr}\left(\Lambda\tilde{\mathbf{P}}_{\text{Sep}}^T\Sigma\tilde{\mathbf{P}}_{\text{Sep}}\right) \end{aligned}$$

$$\begin{aligned}
&= 2 \sum_j \lambda_j^2 - 2 \sum_j \lambda_j \left( \tilde{P}_{\text{Sep},j}^T \Sigma \tilde{P}_{\text{Sep},j} \right) \\
&= 2 \sum_j \lambda_j \left( \lambda_j - \tilde{P}_{\text{Sep},j}^T \Sigma \tilde{P}_{\text{Sep},j} \right).
\end{aligned}$$

Now the only work is to bound the terms  $\left( \lambda_j - \tilde{P}_{\text{Sep},j}^T \Sigma \tilde{P}_{\text{Sep},j} \right)$  for all  $j$ . First, recall  $\tilde{\Sigma}_{\text{Gau}} = \Sigma + \frac{1}{\sqrt{\rho n}} \cdot \mathbf{W}$ , where  $\mathbf{W} \sim \text{SGW}(d)$ . By Lemma 7, with probability at least  $1 - \frac{\beta}{2}$ , for all unit vector  $u$ ,

$$\left| u^T \tilde{\Sigma}_{\text{Gau}} u - u^T \Sigma u \right| = \frac{1}{\sqrt{\rho n}} \cdot |u^T \mathbf{W} u| \leq \frac{\sqrt{2}}{\sqrt{\rho n}} \cdot v(d, \beta/2). \quad (10)$$

For any  $j$ , let  $\mathcal{S}_j = \text{span}\{P_{j+1}, \dots, P_d\}$ , and  $\mathcal{S}'_j = \text{span}\{\tilde{P}_{\text{Sep},j+1}, \dots, \tilde{P}_{\text{Sep},d}\}$ . Let

$$\lambda'_j = \max_{u: \|u\|_2=1, u \in \mathcal{S}'_j} u^T \Sigma u$$

and

$$P'_j = \arg \max_{u: \|u\|_2=1, u \in \mathcal{S}'_j} u^T \Sigma u.$$

By definition,

$$\lambda_j = \max_{u: \|u\|_2=1, u \in \mathcal{S}_j} u^T \Sigma u \leq \max_{u: \|u\|_2=1, u \in \mathcal{S}'_j} u^T \Sigma u = \lambda'_j. \quad (11)$$

Finally, we have

$$\begin{aligned}
\tilde{P}_{\text{Sep},j}^T \Sigma \tilde{P}_{\text{Sep},j} &\geq \tilde{P}_{\text{Sep},j}^T \tilde{\Sigma}_{\text{Gau}} \tilde{P}_{\text{Sep},j} - \frac{\sqrt{2}}{\sqrt{\rho n}} \cdot v(d, \beta) \\
&\geq P_j'^T \tilde{\Sigma}_{\text{Gau}} P'_j - \frac{\sqrt{2}}{\sqrt{\rho n}} \cdot v(d, \beta) \\
&\geq P_j'^T \Sigma P'_j - \frac{2\sqrt{2}}{\sqrt{\rho n}} \cdot v(d, \beta) \\
&\geq \lambda_j - \frac{2\sqrt{2}}{\sqrt{\rho n}} \cdot v(d, \beta).
\end{aligned}$$

The first and third inequalities are from (10). The second inequality is by the definition of  $\tilde{P}_{\text{Sep},j}$ . The last inequality is by (11).  $\square$

## H Proofs for Tail-sensitive Algorithm

**Lemma 8.**  $\|\Sigma(\mathbf{X}) - \Sigma(\text{Clip}(\mathbf{X}, \tau))\|_F \leq \frac{1}{n} \sum_i (\|X_i\|_2^2 - \tau^2) \cdot \mathbb{I}(\|X_i\|_2 \geq \tau) \leq \gamma(\mathbf{X}, \tau)$ .

*Proof.* The proof of this lemma can be derived by the following technical result.

**Claim 1.** For any  $X \in \mathbf{R}^d$ , and  $\tau \leq \|X\|_2$ , let  $\check{X} = \text{Clip}(X, \tau)$ , then,

$$\|XX^T - \check{X}\check{X}^T\|_F = \|X\|_2^2 - \tau^2.$$

By definition,  $\check{X} = \frac{\tau}{\|X\|_2} X$ . Then

$$\begin{aligned}
\|XX^T - \check{X}\check{X}^T\|_F &= \left\| XX^T - \left( \frac{\tau}{\|X\|_2} \right)^2 XX^T \right\|_F \\
&= \frac{\|X\|_2^2 - \tau^2}{\|X\|_2^2} \|XX^T\|_F \\
&= \|X\|_2^2 - \tau^2.
\end{aligned}$$

$\square$



**Theorem 3.** Given any  $\rho > 0$  and  $\beta > 0$ , for any  $\mathbf{X} \in \mathcal{B}_d^n$ , with probability at least  $1 - \beta$ , AdaptiveCov returns a  $\tilde{\Sigma}_{\text{Ada}}$  such that

$$\begin{aligned} \|\tilde{\Sigma}_{\text{Ada}} - \Sigma\|_F &= O\left(\min_{\tau} \left( \text{Noise}\left(\mathbf{X}, \tau, \frac{\rho}{2}, \frac{\beta}{2}\right) \cdot \frac{\log(1/\beta)^{1/4}}{\rho^{1/4}} \cdot \log(n) + \gamma(\mathbf{X}, \tau) \cdot \frac{\log(dn/\beta)}{\sqrt{\rho}} \right) + 2^{-dn}\right) \\ &= \tilde{O}\left(\min_{\tau} (\text{Noise}(\mathbf{X}, \tau) + \gamma(\mathbf{X}, \tau)) + 2^{-dn}\right). \end{aligned}$$

*Proof.* We start by analyzing the error from using the private estimate  $\tilde{r}$  of  $\text{rad}(\mathbf{X})$ . By Lemma 9, we have, with probability at least  $1 - \frac{\beta}{8}$ ,

$$\tilde{r} \leq 2 \cdot \text{rad}(\mathbf{X}) + 2^{-2dn}, \quad (12)$$

and

$$|\{ \|X_i\|_2 > \tilde{r} \}| = O\left(\frac{1}{\sqrt{\rho}} \log \frac{dn}{\beta}\right).$$

This gives

$$\|\Sigma - \Sigma[\tilde{\mathbf{X}}]\|_F = O\left(\frac{\text{rad}(\mathbf{X})^2}{\sqrt{\rho}n} \log \frac{dn}{\beta}\right). \quad (13)$$

Now, we analyze the error  $\|\tilde{\Sigma}_{\text{Ada}} - \Sigma[\tilde{\mathbf{X}}]\|_F$ . First, by tail bound of Gaussian, with probability at least  $1 - \frac{\beta}{8}$ ,

$$\tilde{\text{tr}} \leq \hat{\text{tr}} \leq \tilde{\text{tr}} + \frac{4\sqrt{2} \cdot \tilde{r}^2}{\sqrt{\rho}n} \cdot \sqrt{\log(8/\beta)}. \quad (14)$$

Second, as the discussion in the definitions of  $\text{GaussNoise}(\cdot)$ ,  $\text{SeparateNoise}(\cdot)$  and  $\widehat{\text{Noise}}(\cdot)$ , with probability at least  $1 - \frac{\beta}{2}$ , we have

$$\|\tilde{\Sigma}_{\text{Ada}} - \Sigma[\tilde{\mathbf{X}}]\|_F = O\left(\widehat{\text{Noise}}\left(\tilde{\mathbf{X}}, \hat{\text{tr}}, \tilde{\tau}, \frac{\rho}{2}, \frac{\beta}{2}\right)\right). \quad (15)$$

By (7),

$$\|\Sigma[\tilde{\mathbf{X}}] - \Sigma[\tilde{\mathbf{X}}]\|_F \leq \widehat{\text{Bias}}(\tilde{\mathbf{X}}, \tilde{\tau}). \quad (16)$$

Combining (15) and (16), we have

$$\|\tilde{\Sigma}_{\text{Ada}} - \Sigma[\tilde{\mathbf{X}}]\|_F = O\left(\widehat{\text{Bias}}(\mathbf{X}, \tilde{\tau}) + \widehat{\text{Noise}}\left(\mathbf{X}, \hat{\text{tr}}, \tilde{\tau}, \frac{\rho}{2}, \frac{\beta}{2}\right)\right). \quad (17)$$

Then, let's analyze the error from SVT. There are two sub-cases:  $\tilde{t} = -dn - 1$  and  $\tilde{t} \geq -dn$ . For the first case,  $\tilde{\tau} = 2^{-dn}$  and no query is higher than the threshold. By Lemma 5, with probability at least  $1 - \frac{\beta}{4}$ , for any  $\tau = \tilde{r}, \frac{\tilde{r}}{2}, \dots, 2^{-dn}$ ,

$$\text{Diff}\left(\tilde{\mathbf{X}}, \hat{\text{tr}}, \tau, \frac{\rho}{2}, \frac{\beta}{2}\right) = O\left(\frac{1}{\sqrt{\rho}} \log(dn/\beta)\right),$$

Recall that  $\text{Diff}\left(\tilde{\mathbf{X}}, \hat{\text{tr}}, \tau, \frac{\rho}{2}, \frac{\beta}{2}\right)$  increases with the decrease of  $\tau$ , we have, for all  $\tau = \tilde{r}, \frac{\tilde{r}}{2}, \dots, 2^{-dn}$ ,

$$\left| \text{Diff}\left(\tilde{\mathbf{X}}, \hat{\text{tr}}, \tilde{\tau}, \frac{\rho}{2}, \frac{\beta}{2}\right) - \text{Diff}\left(\tilde{\mathbf{X}}, \hat{\text{tr}}, \tau, \frac{\rho}{2}, \frac{\beta}{2}\right) \right| = O\left(\frac{1}{\sqrt{\rho}} \log(dn/\beta)\right). \quad (18)$$

Therefore, for all  $\tau = \tilde{r}, \frac{\tilde{r}}{2}, \dots, 2^{-dn}$ ,

$$\begin{aligned} &\widehat{\text{Bias}}(\tilde{\mathbf{X}}, \tilde{\tau}) + \widehat{\text{Noise}}\left(\tilde{\mathbf{X}}, \hat{\text{tr}}, \tilde{\tau}, \frac{\rho}{2}, \frac{\beta}{2}\right) \\ &= 2 \cdot \min\left(\widehat{\text{Bias}}(\tilde{\mathbf{X}}, \tilde{\tau}) + \widehat{\text{Noise}}\left(\tilde{\mathbf{X}}, \hat{\text{tr}}, \tilde{\tau}, \frac{\rho}{2}, \frac{\beta}{2}\right)\right) + \frac{\tilde{r}^2}{n} \cdot \left| \text{Diff}\left(\tilde{\mathbf{X}}, \hat{\text{tr}}, \tilde{\tau}, \frac{\rho}{2}, \frac{\beta}{2}\right) \right| \end{aligned}$$

$$\begin{aligned}
&\leq 2 \cdot \max \left( \widehat{\text{Bias}} \left( \tilde{\mathbf{X}}, \tau \right) + \widehat{\text{Noise}} \left( \hat{\text{tr}}, \tau, \frac{\rho}{2}, \frac{\beta}{2} \right) \right) + \frac{\tilde{r}^2}{n} \cdot \left| \text{Diff} \left( \tilde{\mathbf{X}}, \hat{\text{tr}}, \tilde{\tau}, \frac{\rho}{2}, \frac{\beta}{2} \right) \right| \\
&= 2 \cdot \max \left( \widehat{\text{Bias}} \left( \tilde{\mathbf{X}}, \tau \right) + \widehat{\text{Noise}} \left( \hat{\text{tr}}, \tau, \frac{\rho}{2}, \frac{\beta}{2} \right) \right) + \frac{\tilde{r}^2}{n} \cdot \left| \text{Diff} \left( \tilde{\mathbf{X}}, \hat{\text{tr}}, \tau, \frac{\rho}{2}, \frac{\beta}{2} \right) \right| + O \left( \frac{\tilde{r}^2}{\sqrt{\rho n}} \log(dn/\beta) \right) \\
&= O \left( \widehat{\text{Bias}} \left( \tilde{\mathbf{X}}, \tau \right) + \widehat{\text{Noise}} \left( \hat{\text{tr}}, \tau, \frac{\rho}{2}, \frac{\beta}{2} \right) + \frac{\tilde{r}^2}{\sqrt{\rho n}} \log(dn/\beta) \right),
\end{aligned}$$

where the fourth line is by (18). Together with (17), finally, we have

$$\begin{aligned}
&\|\tilde{\Sigma}_{\text{Ada}} - \Sigma[\tilde{\mathbf{X}}]\|_F \\
&= O \left( \min_{2^{-dn} \leq \tau \leq \tilde{r}} \left( \widehat{\text{Bias}} \left( \tilde{\mathbf{X}}, \tau \right) + \widehat{\text{Noise}} \left( \hat{\text{tr}}, \tau, \frac{\rho}{2}, \frac{\beta}{2} \right) \right) + \frac{\tilde{r}^2}{\sqrt{\rho n}} \log(dn/\beta) \right) \quad (19)
\end{aligned}$$

$$= O \left( \min_{2^{-dn} \leq \tau \leq 1} \left( \widehat{\text{Bias}} \left( \tilde{\mathbf{X}}, \tau \right) + \widehat{\text{Noise}} \left( \hat{\text{tr}}, \tau, \frac{\rho}{2}, \frac{\beta}{2} \right) \right) + \frac{\tilde{r}^2}{\sqrt{\rho n}} \log(dn/\beta) \right) \quad (20)$$

For the second case, where  $\tilde{t} \geq -dn$ , by Lemma 5, with probability at least  $1 - \frac{\beta}{4}$ , we have,

$$\text{Diff} \left( \tilde{\mathbf{X}}, \hat{\text{tr}}, 2^{\tilde{t}}, \frac{\rho}{2}, \frac{\beta}{2} \right) \geq -\frac{6\sqrt{2}}{\sqrt{\rho}} \cdot \tilde{r}^2 \cdot \log(8(dn+1)/\beta),$$

and

$$\text{Diff} \left( \tilde{\mathbf{X}}, \hat{\text{tr}}, 2^{\tilde{t}+1}, \frac{\rho}{2}, \frac{\beta}{2} \right) \leq \frac{6\sqrt{2}}{\sqrt{\rho}} \cdot \tilde{r}^2 \cdot \log(8(dn+1)/\beta).$$

Recall  $\text{Diff} \left( \tilde{\mathbf{X}}, \hat{\text{tr}}, \tau, \frac{\rho}{2}, \frac{\beta}{2} \right)$  increases with the decrease of  $\tau$ , thus we have, for all  $\tau = \tilde{r}, \frac{\tilde{r}}{2}, \dots, 2^{-dn}$ ,

$$\left| \text{Diff} \left( \tilde{\mathbf{X}}, \hat{\text{tr}}, 2^{\tilde{t}+1}, \frac{\rho}{2}, \frac{\beta}{2} \right) \right| - \left| \text{Diff} \left( \tilde{\mathbf{X}}, \hat{\text{tr}}, \tau, \frac{\rho}{2}, \frac{\beta}{2} \right) \right| = O \left( \frac{1}{\sqrt{\rho}} \log(dn/\beta) \right),$$

or

$$\left| \text{Diff} \left( \tilde{\mathbf{X}}, \hat{\text{tr}}, 2^{\tilde{t}}, \frac{\rho}{2}, \frac{\beta}{2} \right) \right| - \left| \text{Diff} \left( \tilde{\mathbf{X}}, \hat{\text{tr}}, \tau, \frac{\rho}{2}, \frac{\beta}{2} \right) \right| = O \left( \frac{1}{\sqrt{\rho}} \log(dn/\beta) \right).$$

Further using

$$\widehat{\text{Bias}} \left( \tilde{\mathbf{X}}, 2^{\tilde{t}+1} \right) + \widehat{\text{Noise}} \left( \hat{\text{tr}}, 2^{\tilde{t}+1}, \frac{\rho}{2}, \frac{\beta}{2} \right) \leq \widehat{\text{Bias}} \left( \tilde{\mathbf{X}}, 2^{\tilde{t}} \right) + \widehat{\text{Noise}} \left( \hat{\text{tr}}, 2^{\tilde{t}}, \frac{\rho}{2}, \frac{\beta}{2} \right),$$

and following the same procedure as before, we can also get (20).

Now, we are ready to show how the target error bound can be derived based on (20). Given a  $\tau$ , recall in (7) we have

$$\widehat{\text{Bias}} \left( \tilde{\mathbf{X}}, \tau \right) \leq 2 \cdot \gamma(\tilde{\mathbf{X}}, \tau). \quad (21)$$

Also, recall the definitions of  $\text{GaussNoise}(\cdot)$ ,  $\text{SeparateNoise}(\cdot)$  and  $\text{Noise}(\cdot)$ ; combining them with (14) and the fact  $\tilde{\text{tr}} \leq \text{tr}$ , we have

$$\begin{aligned}
&\widehat{\text{Noise}} \left( \hat{\text{tr}}, \tau, \frac{\rho}{2}, \frac{\beta}{2} \right) \\
&= O \left( \min \left( \frac{\tau^2}{\sqrt{\rho n}} \cdot \omega \left( d, \frac{\beta}{2} \right), \frac{\tau}{\rho^{1/4} \sqrt{n}} \cdot \left( \sqrt{\text{tr}} + \frac{\tilde{r} \cdot \log(1/\beta)^{1/4}}{\rho^{1/4} \sqrt{n}} \right) \cdot \sqrt{v \left( d, \frac{\beta}{4} \right)} + \frac{\tau^2}{\rho^{1/2} n} \cdot \eta \left( d, \frac{\beta}{4} \right) \right) \right) \\
&= O \left( \min \left( \frac{\tau^2}{\sqrt{\rho n}} \cdot \omega \left( d, \frac{\beta}{2} \right), \frac{\tau}{\rho^{1/4} \sqrt{n}} \cdot \left( \sqrt{\text{tr}} + \frac{\text{rad}(\mathbf{X}) \cdot \log(1/\beta)^{1/4}}{\rho^{1/4} \sqrt{n}} \right) \cdot \sqrt{v \left( d, \frac{\beta}{4} \right)} + \frac{\tau^2}{\rho^{1/2} n} \cdot \eta \left( d, \frac{\beta}{4} \right) \right) \right) \\
&\quad + \frac{2^{-2dn}}{\sqrt{\rho n}} \cdot \sqrt{v \left( d, \frac{\beta}{4} \right)} \cdot \log(dn/\beta)
\end{aligned}$$

$$\begin{aligned}
&= O \left( \min \left( \frac{\tau^2}{\sqrt{\rho n}} \cdot \omega \left( d, \frac{\beta}{2} \right), \frac{\tau}{\rho^{1/4} \sqrt{n}} \cdot \left( \sqrt{\text{tr}} + \frac{\sqrt{\text{tr}} \cdot \log(1/\beta)^{1/4}}{\rho^{1/4}} \right) \cdot \sqrt{v \left( d, \frac{\beta}{4} \right)} + \frac{\tau^2}{\rho^{1/2} n} \cdot \eta \left( d, \frac{\beta}{4} \right) \right) \right. \\
&\quad \left. + \frac{2^{-2dn}}{\sqrt{\rho n}} \cdot \sqrt{v \left( d, \frac{\beta}{4} \right)} \cdot \log(dn/\beta) \right) \\
&= O \left( \text{Noise} \left( \mathbf{X}, \tau, \frac{\rho}{2}, \frac{\beta}{2} \right) \cdot \frac{\log(1/\beta)^{1/4}}{\rho^{1/4}} + 2^{-dn} \right). \tag{22}
\end{aligned}$$

The second equality is from (12). The third equality is by the fact  $\text{tr} \geq \frac{\text{rad}^2}{n}$ , and the last equality is by (4).

Finally, combining (13), (20), (21) and (22), we have

$$\begin{aligned}
\|\tilde{\Sigma}_{\text{Ada}} - \Sigma\|_F &= O \left( \min_{2^{-dn} \leq \tau \leq \tilde{r}} \left( \text{Noise} \left( \mathbf{X}, \tau, \frac{\rho}{2}, \frac{\beta}{2} \right) \cdot \frac{\log(1/\beta)^{1/4}}{\rho^{1/4}} + \gamma(\tilde{\mathbf{X}}, \tau) \right) + 2^{-dn} + \frac{\tilde{r}^2}{\sqrt{\rho n}} \log(dn/\beta) \right) \\
&= O \left( \min_{2^{-dn} \leq \tau} \left( \text{Noise} \left( \mathbf{X}, \tau, \frac{\rho}{2}, \frac{\beta}{2} \right) \cdot \frac{\log(1/\beta)^{1/4}}{\rho^{1/4}} + \gamma(\tilde{\mathbf{X}}, \tau) \right) + 2^{-dn} + \frac{\tilde{r}^2}{\sqrt{\rho n}} \log(dn/\beta) \right) \\
&= O \left( \min_{2^{-dn} \leq \tau} \left( \text{Noise} \left( \mathbf{X}, \tau, \frac{\rho}{2}, \frac{\beta}{2} \right) \cdot \frac{\log(1/\beta)^{1/4}}{\rho^{1/4}} + \gamma(\tilde{\mathbf{X}}, \tau) \right) + 2^{-dn} + \frac{\text{rad}(\mathbf{X})^2}{\sqrt{\rho n}} \log(dn/\beta) \right) \\
&= O \left( \min_{2^{-dn} \leq \tau} \left( \text{Noise} \left( \mathbf{X}, \tau, \frac{\rho}{2}, \frac{\beta}{2} \right) \cdot \frac{\log(1/\beta)^{1/4}}{\rho^{1/4}} \cdot \log(n) + \gamma(\mathbf{X}, \tau) \cdot \frac{\log(dn/\beta)}{\sqrt{\rho}} \right) + 2^{-dn} \right) \\
&= O \left( \min_{\tau} \left( \text{Noise} \left( \mathbf{X}, \tau, \frac{\rho}{2}, \frac{\beta}{2} \right) \cdot \frac{\log(1/\beta)^{1/4}}{\rho^{1/4}} \cdot \log(n) + \gamma(\mathbf{X}, \tau) \cdot \frac{\log(dn/\beta)}{\sqrt{\rho}} \right) + 2^{-dn} \right).
\end{aligned}$$

The second line follows from the observation that increasing  $\tau$  beyond  $\tilde{r}$  will increase  $\text{Noise} \left( \mathbf{X}, \tau, \frac{\rho}{2}, \frac{\beta}{2} \right)$  but will not reduce  $\gamma(\tilde{\mathbf{X}}, \tau)$ . The third line is by (12). The fourth line is due to  $\gamma(\mathbf{X}, \tau) \geq \gamma(\tilde{\mathbf{X}}, \tau)$  and the following fact: if  $\tau \geq \text{rad}(\mathbf{X})$ , then  $\frac{\tau^2}{n} \geq \frac{\text{rad}(\mathbf{X})^2}{n}$  and  $\frac{\tau \sqrt{\text{tr}}}{\sqrt{n}} \geq \frac{\text{rad}(\mathbf{X})^2}{n}$ ; otherwise,  $\gamma(\mathbf{X}, \tau) \geq \frac{\text{rad}(\mathbf{X})^2}{n}$ . The last line is because

$$2^{-dn} = \Omega \left( \text{Noise} \left( \mathbf{X}, 2^{-dn}, \frac{\rho}{2}, \frac{\beta}{2} \right) \cdot \frac{\log(1/\beta)^{1/4}}{\rho^{1/4}} \cdot \log(n) \right),$$

and for any  $\tau < 2^{-nd}$

$$\gamma(\mathbf{X}, \tau) \geq \gamma(\mathbf{X}, 2^{-dn}).$$

□

## I Extension to pure-DP

Our proposed algorithms can be extended to the  $\varepsilon$ -DP setting, by simply replacing Gaussian noise with Laplace noise. However, the error is enlarged since the added noise is proportional to  $\ell_1$  sensitivities, which can be much larger than  $\ell_2$  sensitivities. Using the fact that  $\|X\|_2 \leq 1$  implies  $\|X\|_1 \leq \sqrt{d}$ , we immediately obtain an upperbound for the  $\ell_1$  sensitivity of computing  $\Sigma$  based on the  $\ell_2$  sensitivity:

**Lemma 12.** *For any  $\mathbf{X}, \mathbf{X}' \in \mathcal{B}_d^n$ ,  $\mathbf{X} \sim \mathbf{X}'$ ,*

$$\|\Sigma(\mathbf{X}) - \Sigma(\mathbf{X}')\|_1 \leq \frac{\sqrt{d}d}{n}.$$

The  $\ell_1$  sensitivity for computing  $\Lambda$  was shown by [2] to be:

**Lemma 13** ([2]). *For any  $\mathbf{X}, \mathbf{X}' \in \mathcal{B}_d^n$ ,  $\mathbf{X} \sim \mathbf{X}'$ ,*

$$\|\Lambda - \Lambda'\|_1 \leq \frac{2}{n}.$$

Under  $\varepsilon$ -DP, our base mechanism is the Laplace mechanism. In the same spirit as the Gaussian mechanism, we draw a symmetric  $d \times d$  noise matrix  $\mathbf{W}$  where the entries on and above the diagonal are i.i.d.  $\text{Lap}(1)$ . For convenience, we refer to  $\mathbf{W}$  as a Symmetric Laplace Wigner matrix and write  $\mathbf{W} \sim \text{SLW}(d)$ . Then, we scale the noise matrix by the factor  $\frac{\sqrt{2d}}{\varepsilon n}$ . We refer to the modified algorithm as LapCov. For SeparateCov, we use LapCov to replace GaussCov for privatizing eigenvectors and add Laplace noise in place of Gaussian noise to privatize the eigenvalues.

## I.1 Concentration inequalities

Before we proceed to analyze the error of our modified algorithms, some concentration bounds for the Laplace noise vectors and matrices are in order. Our derivations are based on two lemmata.

**Lemma 14** ([35]). *Let  $Y_1, \dots, Y_m$  be independent sub-exponential random variables with  $\mathbf{E}[Y_k] = 0$  for  $1 \leq k \leq m$ . Let  $f : \mathbb{R}^m \rightarrow \mathbb{R}$  be convex and 1-Lipschitz. Then for  $Y = (Y_1, \dots, Y_m)$ , and some constant  $c > 0$ ,*

$$\Pr[|f(Y) - \mathbf{E}[f(Y)]| > t] \leq 2 \exp\left(-c \cdot \frac{t}{\log(m)}\right).$$

**Lemma 15** ([7]). *For any  $d > 0$ , let  $\mathbf{W}$  be a  $d \times d$  Symmetric Laplace Wigner matrix. Then,*

$$\mathbf{E}[\|\mathbf{W}\|_2] \leq 3\sqrt{d} + \frac{9\log(d)}{\sqrt{\log(1.5)}}.$$

Based on these, we have

**Lemma 16.** *For any  $d > 0$ ,  $\beta > 0$ , let  $Y = (Y_1, \dots, Y_d)$  where  $Y_k \sim \text{Lap}(1)$ , for  $1 \leq k \leq d$ . Then for some constant  $c > 0$ , with probability at least  $1 - \beta$ ,*

$$\|Y\|_2 \leq \frac{3}{2}\sqrt{d} + O(\log(1/\beta) \cdot \log(d)).$$

*Proof.* First, note that  $\mathbf{E}[\|Y\|_2] \leq \frac{3}{2}\sqrt{d}$ . Indeed,

$$\frac{\mathbf{E}[\|Y\|_2]}{\sqrt{d}} = \mathbf{E}\left[\frac{\|Y\|_2}{\sqrt{d}}\right] \leq \mathbf{E}\left[\frac{1}{2}\left(1 + \frac{\|Y\|_2^2}{d}\right)\right] = \frac{1}{2}\left(1 + \frac{\sum_k \mathbf{E}[Y_k^2]}{d}\right) = \frac{1}{2}\left(1 + \frac{\sum_k 2}{d}\right) = \frac{3}{2},$$

where the inequality is due to  $\sqrt{z} \leq \frac{1+z}{2}$  for  $z \geq 0$  and the second last equality is due to  $Y_k \sim \text{Lap}(1)$  with mean 0 and variance 2. Applying Lemma 14 with  $m = d$  then gives the stated inequality.  $\square$

**Lemma 17.** *For any  $d > 0$ ,  $\beta > 0$ , given  $\mathbf{W} \sim \text{SLW}(d)$ , then, with probability at least  $1 - \beta$ ,*

$$\|\mathbf{W}\|_2 \leq 3\sqrt{d} + O(\log(1/\beta) \cdot \log(d)).$$

*Proof.* Note that the function of computing  $\|\cdot\|_2$  is convex and 1-Lipschitz for matrices [39]. Note that  $\mathbf{W}$  has  $m = d(d+1)/2$  independent entries. We apply Lemma 14 to get the stated inequality.  $\square$

**Lemma 18.** *For any  $d > 0$ ,  $\beta > 0$ , given  $\mathbf{W} \sim \text{SLW}(d)$ , then, with probability at least  $1 - \beta$ ,*

$$\|\mathbf{W}\|_F \leq \frac{3}{2}d + O(\log(1/\beta) \cdot \log(d)).$$

*Proof.* Similar to the proof of Lemma 16, we compute  $\mathbf{E}[\|\mathbf{W}\|_F]$  and apply Lemma 14 with  $m = d(d+1)/2$ .

$$\begin{aligned} \frac{\mathbf{E}[\|\mathbf{W}\|_F]}{d} &\leq \frac{1}{2} \cdot \mathbf{E}\left[1 + \frac{\|\mathbf{W}\|_F^2}{d^2}\right] \\ &= \frac{1}{2} \left(1 + \frac{\sum_k \mathbf{E}[W_{k,k}^2] + 2 \sum_{j < k} \mathbf{E}[W_{j,k}^2]}{d^2}\right) \\ &= \frac{1}{2} \left(1 + \frac{2d + 2d(d-1)}{d^2}\right) = \frac{3}{2}. \end{aligned}$$

$\square$

## I.2 Error bounds

Based on Lemma 18, LapCov achieves error  $O\left(\frac{d^2}{\varepsilon n} + \frac{d}{\varepsilon n} \cdot \log(1/\beta) \cdot \log(d)\right) = \tilde{O}\left(\frac{d^2}{n}\right)$  and by Lemma 16 and 17, we have

**Lemma 19.** *Given any  $\varepsilon > 0$ , for any  $\mathbf{X} \in \mathcal{B}_d^n$ , SeparateCov preserves  $\varepsilon$ -DP and for any  $\beta > 0$ , with probability at least  $1 - \beta$ , SeparateCov returns a  $\tilde{\Sigma}_{\text{Lap}}$  such that*

$$\begin{aligned} \|\tilde{\Sigma}_{\text{Sep}} - \Sigma\|_F &= O\left(\frac{\sqrt{d \cdot \text{tr}}}{\sqrt{\varepsilon n}} \cdot \sqrt{\sqrt{d} + \log(1/\beta) \cdot \log(d)} + \frac{1}{\varepsilon n} \left(\sqrt{d} + \log(1/\beta) \cdot \log(d)\right)\right) \\ &= \tilde{O}\left(\frac{d^{3/4} \sqrt{\text{tr}}}{\sqrt{n}} + \frac{\sqrt{d}}{n}\right). \end{aligned}$$

Under  $\varepsilon$ -DP, EMCov achieves the error  $\tilde{O}\left(\frac{d \sqrt{\text{tr}}}{\sqrt{n}} + \frac{\sqrt{d}}{n}\right)$ , so SeparateCov improves the  $d$  dependency in the first term from  $d$  to  $d^{3/4}$ . Note that our trace-sensitive bound also implies a worst-case bound of  $\tilde{O}\left(\frac{d^{3/4}}{\sqrt{n}}\right)$ . Concurrently with our work, Nikolov [30] shows how to achieve a better worst-case bound of  $\tilde{O}\left(\frac{\sqrt{d}}{\sqrt{n}}\right)$ , as an application of a new private query release mechanism based on the Johnson-Lindenstrauss transform, although his approach does not seem to yield a trace-sensitive bound.

Finally, we modify the AdaptiveCov algorithm to support  $\varepsilon$ -DP. To this end, we first replace GaussCov with LapCov and SeparateCov with its  $\varepsilon$ -DP version. Then, since PrivRadius and SVT already satisfy pure DP, the remaining modification is to use a Laplace tail bound in place of the Gaussian tail bound when constructing the DP upper bound of  $\text{tr}$ . Based on these, we have,

**Theorem 4.** *Given any  $\varepsilon > 0$ , for any  $\mathbf{X} \in \mathcal{B}_d^n$ , AdaptiveCov preserves  $\varepsilon$ -DP and for any  $\beta > 0$ , with probability at least  $1 - \beta$ , AdaptiveCov returns a  $\tilde{\Sigma}_{\text{Ada}}$  such that*

$$\|\tilde{\Sigma}_{\text{Ada}} - \Sigma\|_F = \tilde{O}\left(\min_{\tau} \left( \min \left( \frac{\tau^2 d^2}{n}, \frac{\tau d^{3/4} \sqrt{\text{tr}}}{\sqrt{n}} + \frac{\tau^2 \sqrt{d}}{n} \right) + \gamma(\mathbf{X}, \tau) \right) + 2^{-dn} \right).$$

## J Additional Experiments

### J.1 $\rho$ -zCDP experiments on MNIST digits

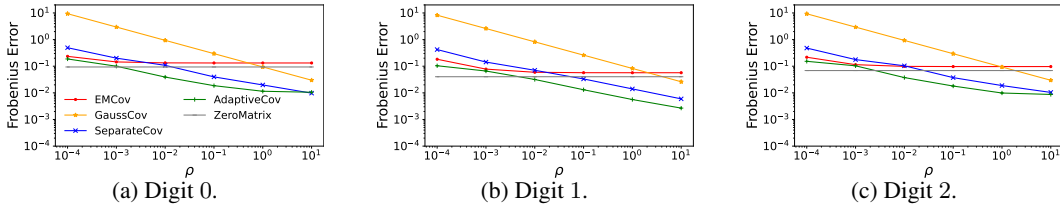

Figure 6: Results on MNIST digits.

### J.2 Pure DP experiments

We also conducted experiments using the pure DP algorithms on the same datasets as in Section 6. The parameter settings are also mostly the same, except we replaced  $\varepsilon$  with  $\rho$ . For synthetic datasets, we also present an extra set of experiments with a larger sample size  $n$ . Since the dependency on  $d$  degrades for all the algorithms, a larger sample size is needed in order for them to have an advantage over the zero matrix. As mentioned in Appendix C, [2] propose two ways to allocate privacy budget for eigenvector estimation under pure-DP; one of them being uniform allocation and the other is to allocate more budget to larger (privatized) eigenvalues. We tested both and their error appeared similar, with the latter being slightly better in some cases (as consistent with their report). Here, we only report the results for the latter budget allocation scheme.

The experimental results agree with our theoretical analysis and are similar as those in  $\rho$ -zCDP setting: SepCov always outperforms EMCov and will perform better than LapCov with higher  $d$ , smaller  $n$ , and smaller  $\varepsilon$ . Also, as expected, to outperform the zero matrix, we require larger  $n$ , smaller  $d$ , and larger  $\varepsilon$  compared with the  $\rho$ -zCDP setting. For real-world datasets, since they are highly dimensional with limited samples, none of the algorithms have better utility than the zero matrix (except when  $d$  is small and  $\varepsilon$  is large); as such we do not report the results for real-world datasets here.

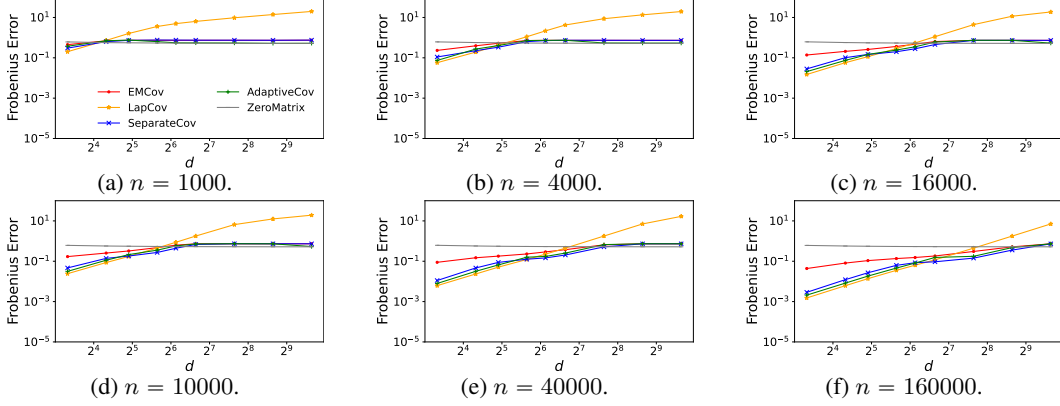

Figure 7: Results on synthetic datasets fixing  $\text{tr} = 1$ .

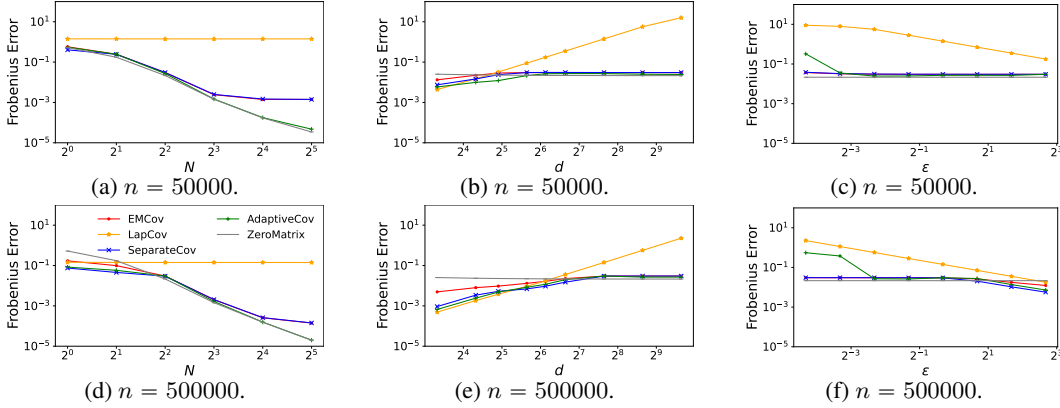

Figure 8: Results on synthetic datasets as  $d$ ,  $N$  or  $\varepsilon$  varies.

## Checklist

1. For all authors...
  - (a) Do the main claims made in the abstract and introduction accurately reflect the paper's contributions and scope? [\[Yes\]](#)
  - (b) Did you describe the limitations of your work? [\[Yes\]](#) See Section 2.
  - (c) Did you discuss any potential negative societal impacts of your work? [\[N/A\]](#)
  - (d) Have you read the ethics review guidelines and ensured that your paper conforms to them? [\[Yes\]](#)
2. If you are including theoretical results...
  - (a) Did you state the full set of assumptions of all theoretical results? [\[Yes\]](#)
  - (b) Did you include complete proofs of all theoretical results? [\[Yes\]](#)
3. If you ran experiments...

- (a) Did you include the code, data, and instructions needed to reproduce the main experimental results (either in the supplemental material or as a URL)? [\[Yes\]](#) See URL in Section 6.
  - (b) Did you specify all the training details (e.g., data splits, hyperparameters, how they were chosen)? [\[Yes\]](#)
  - (c) Did you report error bars (e.g., with respect to the random seed after running experiments multiple times)? [\[No\]](#)
  - (d) Did you include the total amount of compute and the type of resources used (e.g., type of GPUs, internal cluster, or cloud provider)? [\[Yes\]](#) See URL in Section 6.
4. If you are using existing assets (e.g., code, data, models) or curating/releasing new assets...
- (a) If your work uses existing assets, did you cite the creators? [\[Yes\]](#) URLs are also provided where data were retrieved.
  - (b) Did you mention the license of the assets? [\[N/A\]](#)
  - (c) Did you include any new assets either in the supplemental material or as a URL? [\[N/A\]](#)
  - (d) Did you discuss whether and how consent was obtained from people whose data you're using/curating? [\[N/A\]](#)
  - (e) Did you discuss whether the data you are using/curating contains personally identifiable information or offensive content? [\[N/A\]](#)
5. If you used crowdsourcing or conducted research with human subjects...
- (a) Did you include the full text of instructions given to participants and screenshots, if applicable? [\[N/A\]](#)
  - (b) Did you describe any potential participant risks, with links to Institutional Review Board (IRB) approvals, if applicable? [\[N/A\]](#)
  - (c) Did you include the estimated hourly wage paid to participants and the total amount spent on participant compensation? [\[N/A\]](#)
